# Supplementary material for: Triclosan Resistome from Metagenome Reveals Diverse Enoyl Acyl Carrier Protein Reductases and Selective Enrichment of Triclosan Resistance Genes
Source: PubMed Central journal article supplement (PMC5006077; doi:10.1038/srep32322), 2016-08-31
Supplement: srep32322-s1.pdf [file srep32322-s1.pdf]

**Triclosan Resistome from Metagenome Reveals Diverse Enoyl Acyl Carrier Protein  
Reductases and Selective Enrichment of Triclosan Resistance Genes**

Running title: Triclosan resistome from the metagenome

Raes Khan<sup>1†</sup>, Hyun Gi Kong<sup>1†</sup>, Yong-Hoon Jung<sup>2</sup>, Jinhee Choi<sup>2</sup>, Kwang-Yeol Baek<sup>2</sup>, Eul Chul Hwang<sup>1</sup> and Seon-Woo Lee<sup>1,2\*</sup>

<sup>1</sup>*Department of Applied Biology, Dong-A University, Busan 604-714, Republic of Korea*

<sup>2</sup>*Department of Applied Bioscience, Dong-A University, Busan 604-714, Republic of Korea*

<sup>†</sup>These authors contributed equally to this work.

\*Corresponding author

Seon-Woo Lee, Ph.D

Professor

Department of Applied Bioscience

Dong-A University

Busan 49315

Republic of Korea

Email: [seonlee@dau.ac.kr](mailto:seonlee@dau.ac.kr)

TEL: +82-51-200-7551

FAX: +82-51-200-7505

## **Guide for supplementary information of the manuscript**

### **1. Supplementary Information**

This file contains Supplementary Figures and Supplementary Tables combined. Supplementary figures are placed first followed by Supplementary tables. There are total 7 Supplementary figures, labelled as Supplementary Figure S1-Supplementary figure S7. Supplementary figures are followed by 31 Supplementary Tables, labelled as Supplementary Table S1-Supplementary Table S31.

### **Other files provided as a single supplementary data files include**

#### **2) Supplementary Data 1.xlsx**

This file consists of two spread sheets. The first spreadsheet contains gene information indicating the presence of metagenome derived substitutions in FabI ENRs from 372 well-known human-associated pathogenic and nonpathogenic bacterial strains. The second spread sheet contains same information for 29 well known soil borne plant pathogenic strains. Additional necessary information about individual strains is also mentioned.

#### **3) Supplementary Data 2.xlsx**

This file consists of two spread sheets. The first spreadsheet has detailed information about the metagenomic data sets retrieved from public repository site, MG-RAST, such as nature and origin of the sample, sequencing method used, project etc. The second spreadsheet represents information about TRG-Reference database, such as information about the prototypic and metagenomic ENRs used for constructing this database.

#### **4) Supplementary material Figure 5.xlsx**

This file consists of 12 spread sheets, enclosing information on BLASTx search result of ENR homologues from metagenome dataset, normalized data from each corresponding metagenomic environment, normalized abundance data, and ENR abundance data enclosed for Figure 5-a,b,c,e,f.

#### **5) Supplementary materials Figure 5D.xlsx**

This file contains the R script information, mapping file and additional data using which Principal coordinate analysis (PCoA) plot was made for Figure 5-d.

## Supplementary Figures and Supplementary Tables

### [Supplementary Figure. S1]

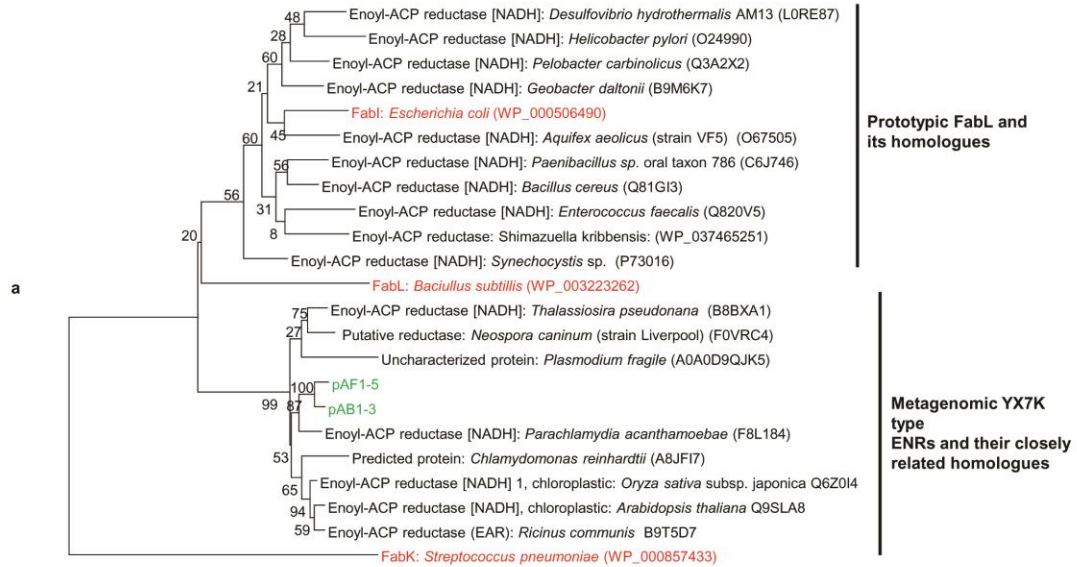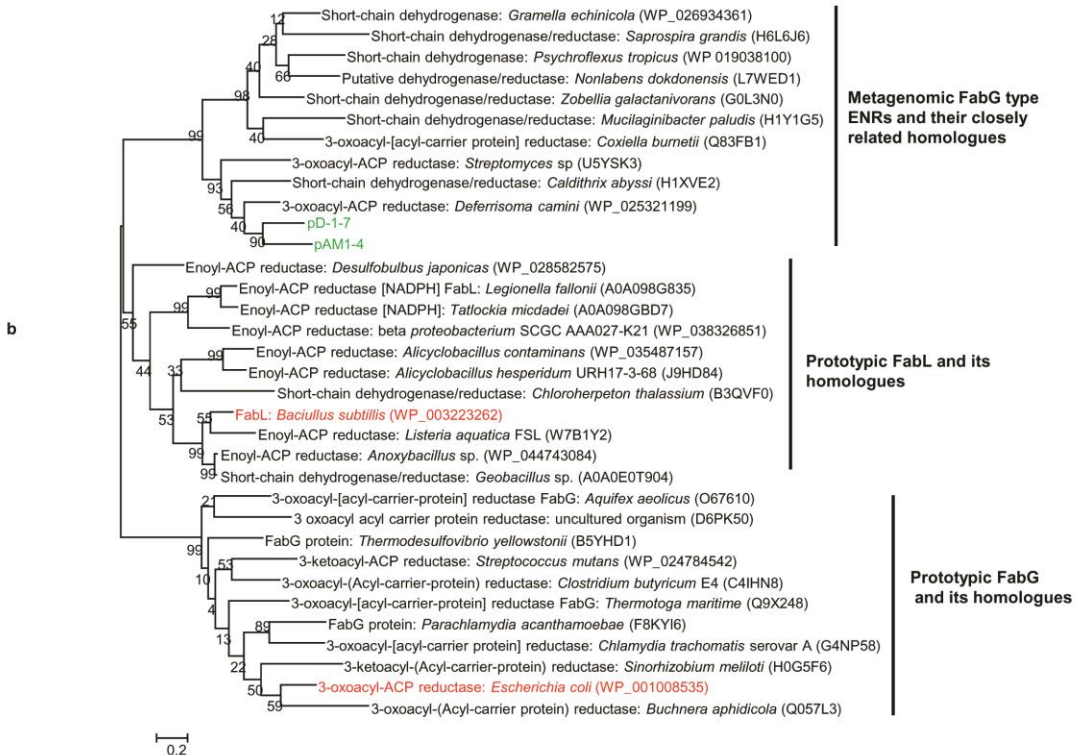

**Supplementary Figure S1. The metagenomic YX7K-type ENRs and 3-oxoacyl-ACP reductase (FabG)-like ENRs and their homologues clustered as a separate clade from other closely related prototypic ENRs.** **a**, Phylogenetic tree of metagenomic YX7K-type ENRs; pAF1-5 and pAB1-3 (green), FabI, FabL homologues and FabK as an outgroup. Maximum likelihood analysis of the well-characterized FabI, FabL and FabK enzymes (red) and homologues of metagenomic YX7K-type ENRs and closely related FabI ENRs with sequence identity over 50% from the Uniref50 database. Bootstrap values are indicated for each node in a bootstrap analysis of 500 replicates. The scale bar represents 0.5 estimated amino acid substitutions per residue. **b**, Phylogenetic tree of metagenomic 3-oxoacyl-ACP reductase (FabG) type ENRs (green), prototypic 3-oxoacyl-ACP reductase and closely related FabL. Maximum likelihood analysis of well-characterized 3-oxoacyl-ACP reductase and FabL enzymes (red) and homologues of metagenomic 3-oxoacyl-ACP reductase-type ENRs and prototypic FabL ENRs with sequence identity over 50% from the Uniref50 database. Bootstrap values are indicated for each node in a bootstrap analysis of 500 replicates. The scale bar represents 0.2 estimated amino acid substitutions per residue.

[Supplementary Figure. S2]

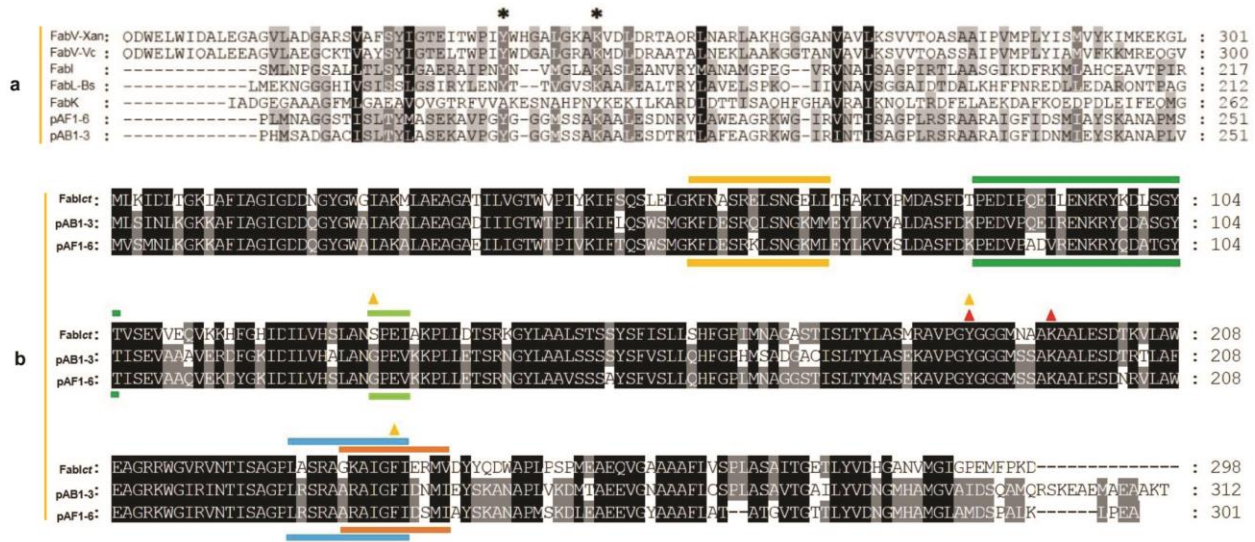

**Supplementary Figure S2. Metagenomic triclosan-resistant ENRs with a YX7K-type catalytic domain.** **a**, Multiple alignment (partial) of metagenomic YX7K-type ENRs with known prototypic bacterial ENRs. The known prototypic ENRs include the FabV ENRs from *Xanthomonas oryzae* (FabV-Xan) and *Vibrio cholerae* (FabV-Vc), FabI from *E. coli* (FabI), FabL from *Bacillus subtilis* (FabL-Bs), and FabK from *Streptococcus pneumoniae* (FabK). Metagenomic YX7K-type ENRs shared 25-30% maximum identity with *E. coli* FabI and *B. subtilis* FabL ENRs. The active site tyrosine and lysine residues are indicated with asterisks. Unlike other prototypic ENRs, the metagenome-derived ENR homologues carried a different YX7K-type catalytic domain. **b**, Multiple alignment of metagenomic YX7K-type ENRs with *Chlamydia trachomatis* ENR (on top). The YX7K-type active site tyrosine and lysine residues are indicated with red triangles. Two additional loops that are not present in closely related prototypic FabIs are indicated by orange and dark green bars. The flipping loop, the substrate binding loop, and the lid loops are indicated in cyan, sandy brown and lime green bars,

respectively. Residues Y<sub>187</sub>, S<sub>129</sub> and F<sub>234</sub> of FabI<sub>Ict</sub> interact with antibacterial AFN1252 and are indicated by orange pyramids.

[Supplementary Figure. S3]

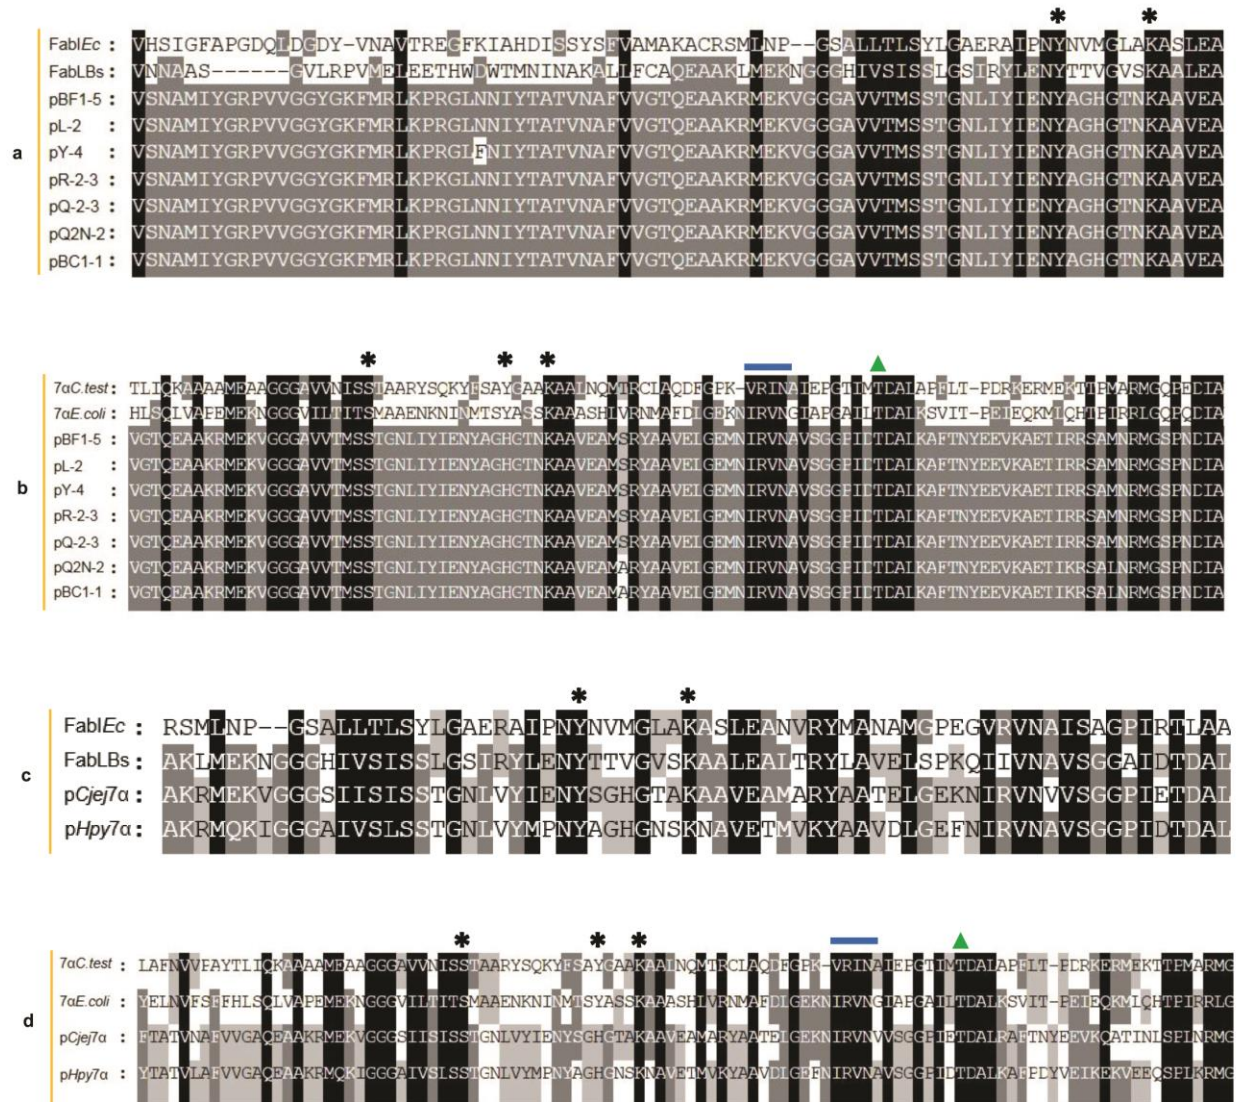

**Supplementary Figure S3. Metagenomic 7- $\alpha$ -HSDH-like ENR homologues, which are present in Epsilonproteobacteria, share similar structural features with closely related well-characterized 7- $\alpha$ -HSDH and with prototypic FabI and FabL ENRs. a, Multiple**

alignment (partial) of metagenomic 7- $\alpha$ -HSDH-like ENR homologues with *E. coli* FabI and *B. subtilis* FabL. The metagenomic 7- $\alpha$ -HSDH homologues shared low similarities with FabI and FabL but still shared a similar catalytic domain. The active site tyrosine and lysine residues are indicated with asterisks. **b**, Multiple alignment (partial) of metagenomic 7- $\alpha$ -HSDH-like ENRs with 7- $\alpha$ -HSDH from *C. testosteroni* and *E. coli* (on top). The residues involved in the catalytic function of the enzyme are indicated with asterisks. In metagenomic 7- $\alpha$ -HSDH-like ENRs, the Y<sub>159</sub>/Y<sub>161</sub> residue (in *E. coli* and *C. testosteroni*, respectively), which acts as a basic catalyst, has been replaced with a histidine, whereas the other two residues, S<sub>146</sub>/S<sub>148</sub> and K<sub>163</sub>/K<sub>165</sub>, are strictly conserved among these 7- $\alpha$ -HSDH-like metagenomic ENRs. The RINA-like sequences, necessary for reaction direction, are indicated by blue bars, whereas the conserved threonine is indicated by a green triangle. **c**, Multiple alignment (partial) of prototypic FabI from *E. coli* and FabL from *B. subtilis* (on top) with 7- $\alpha$ -HSDH from *C. jejuni* and *H. pylori*. The active site tyrosine and lysine residues are indicated with asterisks. **d**, Multiple alignment (partial) of 7- $\alpha$ -HSDH-like ENRs from *C. jejuni* and *H. pylori* with *E. coli* and *C. testosteroni* 7- $\alpha$ -HSDH (on top). The residues involved in the catalytic function of the enzyme are indicated with asterisks. Similar to metagenomic 7- $\alpha$ -HSDH-like ENRs, the Y<sub>159</sub>/Y<sub>161</sub> residue (of *E. coli* and *C. testosteroni*, respectively), which acts as a basic catalyst, has been replaced by histidine, whereas the other two residues, S<sub>146</sub>/S<sub>148</sub> and K<sub>163</sub>/K<sub>165</sub>, are strictly conserved among these 7- $\alpha$ -HSDH-like ENRs. The RINA-like sequence, necessary for reaction direction, is indicated by a blue bar, whereas the conserved threonine is indicated by a green triangle.

[Supplementary Figure. S4]

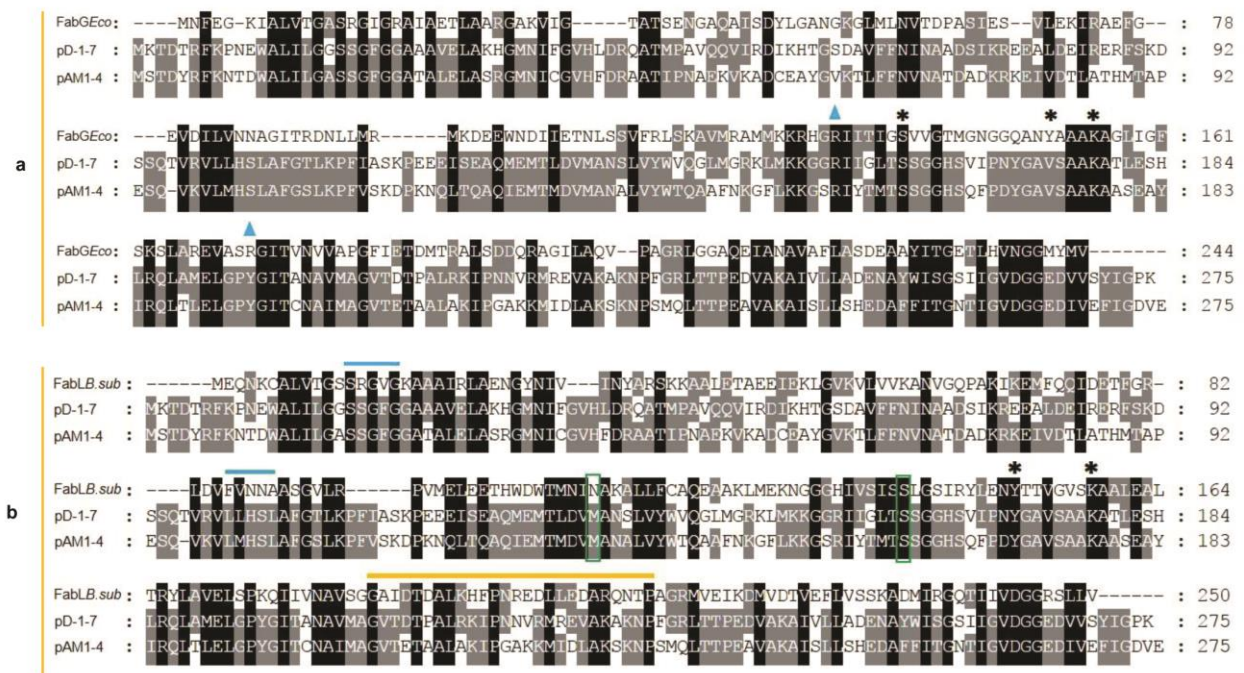

**Supplementary Figure S4. Metagenomic 3-oxoacyl-[acyl-carrier-protein] reductase (FabG)-like ENR candidates share common features with both the prototypic FabG of *E. coli* and the FabL of *B. subtilis*.** **a**, Multiple alignment of FabG of *E. coli* (on top) with metagenomic FabG-like ENR candidates. The active site triad residues Ser<sub>138</sub>, Tyr<sub>151</sub> and Lys<sub>155</sub> are indicated with asterisks, and Tyr<sub>151</sub> is replaced with a nonpolar valine in the metagenomic FabG-like ENR candidates. Cyan triangles indicate the two arginine residues that are central to ACP-binding. **b**, Multiple alignment of the FabL ENR of *B. subtilis* with metagenomic FabG-like ENR candidates. The YX6K active site residues are indicated with asterisks. The substrate-binding region and the residues involved in cofactor binding are indicated by orange and cyan bars, respectively. The highly conserved Asn<sub>113</sub> and Ser<sub>141</sub> residues are boxed in green.



[Supplementary Figure. S5]

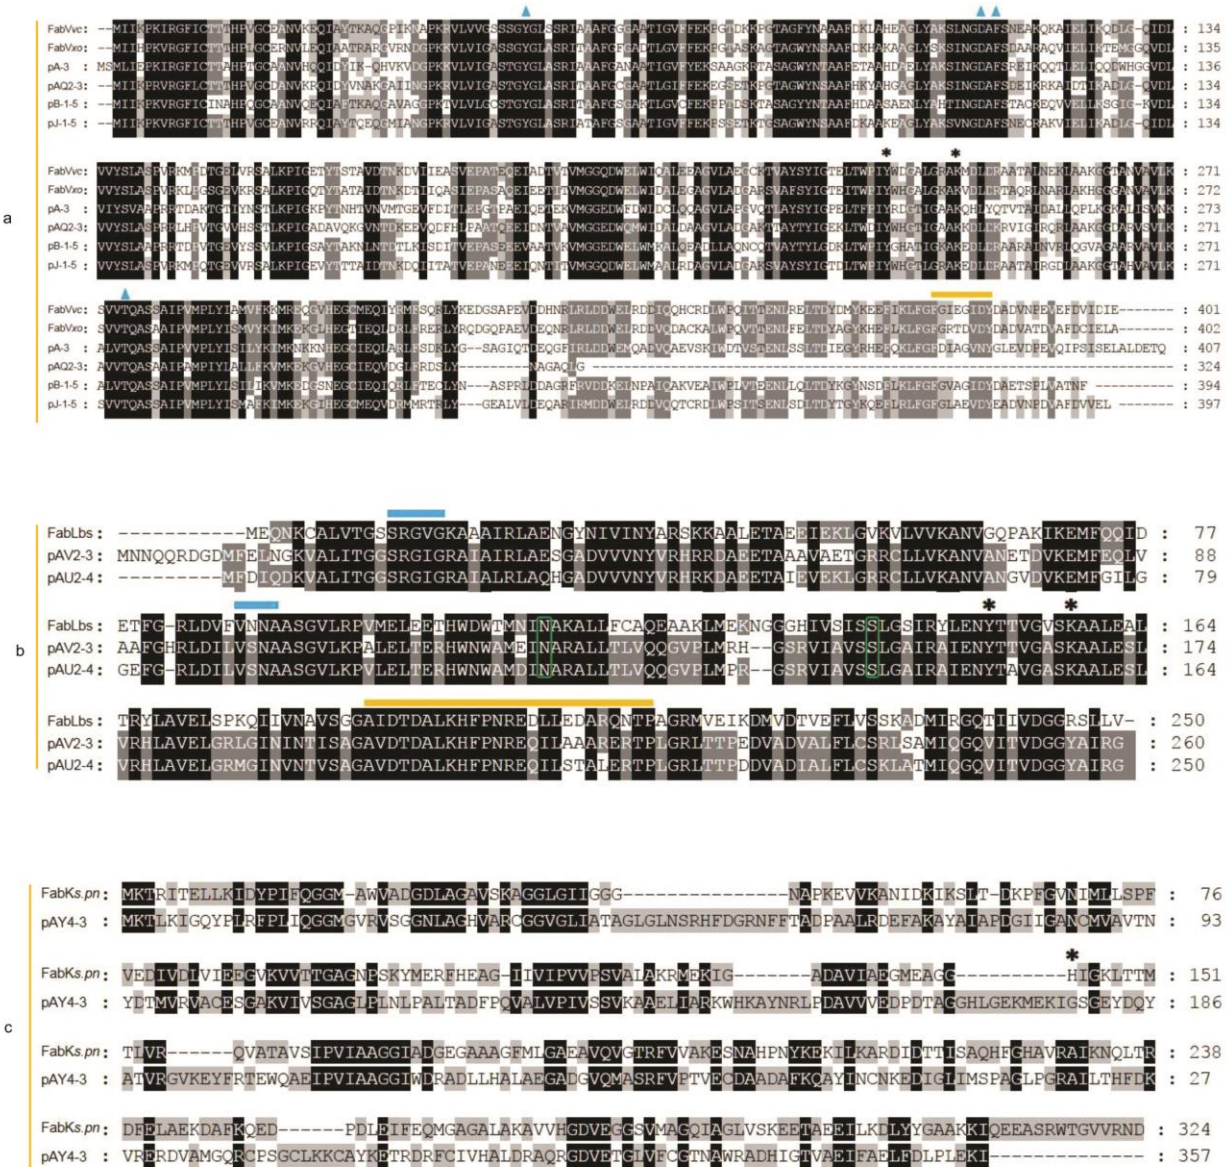

Supplementary Figure S5. Metagenomic FabV, FabL and FabK-like ENR homologues showed compromised ENR activity and lower resistance despite having shared structural similarities with previously known prototypic ENRs. a, Multiple alignment of metagenomic FabV ENR homologues with FabV from *V. cholerae* (FabVvc) and *X. oryza*

(FabV<sub>xo</sub>). The YX8K-type active site tyrosine and lysine residues are indicated with asterisks. Residues with key enzyme functions are indicated by cyan triangles. The conserved FAD-binding domain is indicated with an orange bar. **b**, Multiple alignment of metagenomic FabL ENR homologues with FabL from *B. subtilis* (on top). The YX6K-type active site residues are indicated with asterisks. The substrate-binding region is indicated by orange bars. Residues involved in cofactor binding are indicated by cyan bars. Highly conserved asparagine and serine residues are boxed in green. **c**, Multiple alignment of the metagenomic FabK homologue with FabK of *S. pneumoniae*. The conserved histidine<sub>144</sub> residue is indicated with an asterisk. This residue has been replaced by glycine in the metagenomic FabK-like ENR homologue.

[Supplementary Figure. S6]

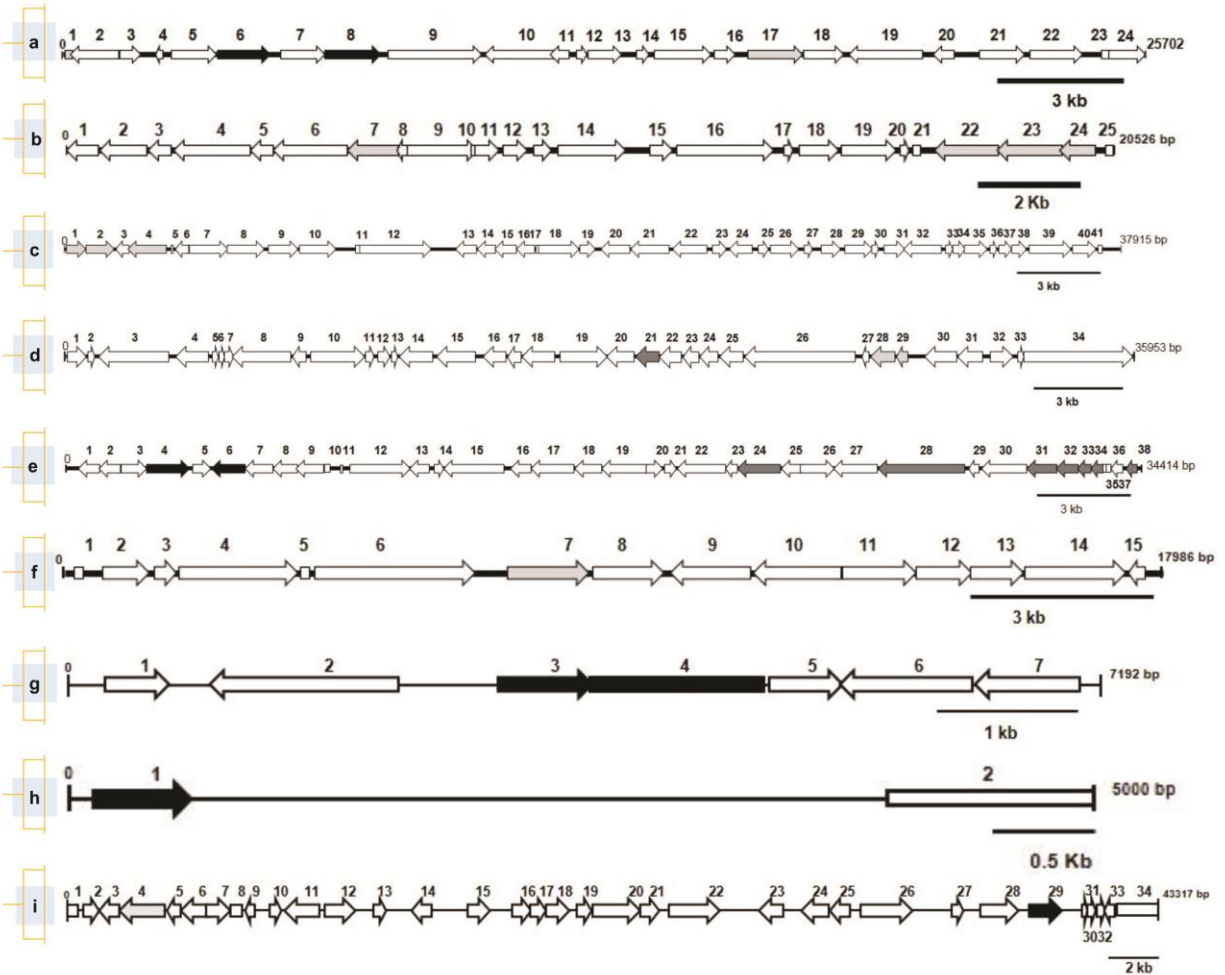

**Supplementary Figure S6. Non-ENR genes conferred resistance to TCS in some metagenomic clones.** In each ORF map, a DNA size scale is shown at the bottom right. All of the black- or gray-marked ORFs are described below. **a**, Genetic organization of ORFs in clone pBE3. Putative ORFs are listed from 1 to 24: *orf*<sub>6,8</sub> encodes MFS transporter homologues, whereas *orf*<sub>1,17</sub> encodes a mobile element signature homologue. **b**, Genetic organization of ORFs in clone pAY4-1. Putative ORFs are listed from 1 to 25, and *orf*<sub>7,22-24</sub> encode efflux transporter protein homologues. **c**, Genetic organization of ORFs in clone pAW1. Putative

ORFs are listed from 1 to 41, and *orf*<sub>1,2,4</sub> encode oxidases and photolyases, respectively. **d**, Genetic organization of ORFs in clone pAX1. Putative ORFs are listed from 1 to 34, and *orf*<sub>21</sub> encodes an alpha/beta hydrolase, whereas *orf*<sub>28,29</sub> encodes mobile element signatures. **e**, Genetic organization of ORFs in clone pAP3. Putative ORFs are listed from 1 to 38, and *orf*<sub>4,6</sub> encodes an MFS transporter and aldo-keto reductase homologues, respectively. The *orf*<sub>24,28,31-34,38</sub> encodes mobile element signatures. **f**, Genetic organization of ORFs in clone pAG2. Putative ORFs are listed from 1 to 15, and *orf*<sub>7</sub> encodes an MFS transporter homologue. **g**, Genetic organization of ORFs in metagenomic clone pW-1. Putative ORFs are listed from 1 to 7, and *orf*<sub>3,4</sub> encode ABC transporter efflux homologues. **h**, Genetic organization of ORFs in clone pBB2-1. Putative ORFs are listed from 1 to 2, and *orf*<sub>1</sub> encodes a TCS-resistant AcrB efflux protein homologue that was 5 times smaller than prototypic AcrB proteins. **i**, Genetic organization of ORFs in clone pAH4. Putative ORFs are listed from 1 to 34, and *orf*<sub>29</sub> encodes a TCS-tolerant novel-hypothetical-protein-homologue-like ENR candidate. *orf*<sub>4</sub> encodes an ABC transporter that might be responsible for the observed co-resistance to other antibiotics.

[Supplementary Figure. S7]

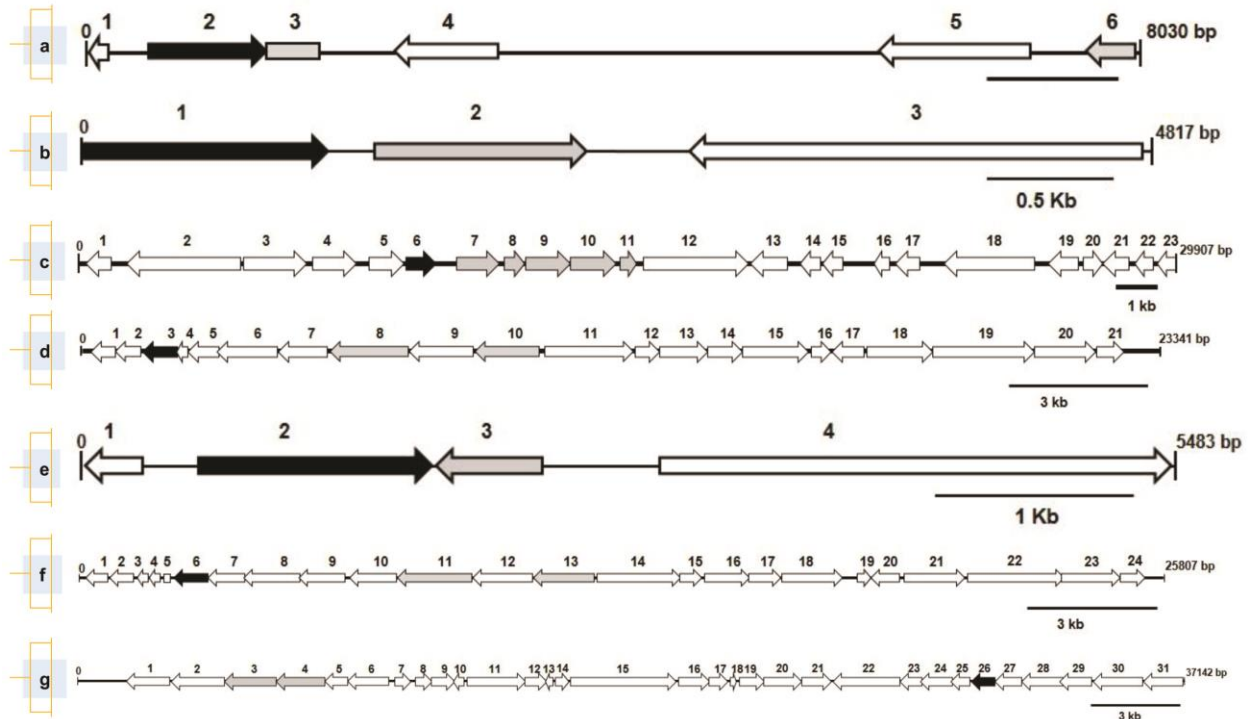

**Supplementary Figure S7. Metagenomic TCS-resistant clones conferred co/cross-resistance to other antibiotics.** In all ORF maps, a DNA size scale is shown at the bottom right. **a**, Genetic organization of ORFs in clone pAF1-5. Putative ORFs are listed from 1 to 6, and *orf<sub>2</sub>* encodes a YX7K-type ENR homologue. *orf<sub>3,6</sub>* encode a hydrolase and an exopolysaccharide synthesis protein that might be responsible for the observed co-resistance to other antibiotics. **b**, Genetic organization of ORFs in clone pAQ2-2. Putative ORFs are listed from 1 to 3, and *orf<sub>1</sub>* encodes a mildly TCS-tolerant FabV-type ENR homologue with compromised ENR activity. *orf<sub>2</sub>* encodes a beta-lactamase that may be responsible for the observed co-resistance to other antibiotics. **c**, Genetic organization of ORFs in clone pAV2. Putative ORFs are listed from 1 to 23, and *orf<sub>6</sub>* encodes a TCS-resistant FabL ENR homologue. *orf<sub>7,8,9,10,11</sub>* encode an ARG cluster, composed of different efflux pumps and antibiotic-

modifying enzymes that might be responsible for the observed resistance to other antibiotics.

**d**, Genetic organization of ORFs in clone pL. Putative ORFs are listed from 1 to 21, and *orf*<sub>3</sub> encodes a 7- $\alpha$ -HSDH-like ENR homologue, whereas *orf*<sub>8,10</sub> encode ABC and MurJ efflux pump protein homologues, respectively. **e**, Genetic organization of ORFs in clone pB-1-4. Putative ORFs are listed from 1 to 4, and *orf*<sub>2</sub> encodes a TCS-resistant FabV ENR homologue, while *orf*<sub>3</sub> encodes a hydrolase. **f**, Genetic organization of ORFs in clone pBF1. Putative ORFs are listed from 1 to 24; *orf*<sub>6</sub> encodes a 7- $\alpha$ -HSDH-like ENR homologue, and *orf*<sub>11,13</sub> encode ABC and MurJ efflux pump protein homologues, respectively. **g**, Genetic organization of ORFs in clone pBC1. Putative ORFs are listed from 1 to 31, and *orf*<sub>26</sub> encodes a 7- $\alpha$ -HSDH-like ENR homologue, while *orf*<sub>3,4</sub> encode AcrB efflux pump protein homologues. ORFs shown in black are genes encoding ENRs, and those in gray are candidate genes for co/cross-resistance to other antibiotics.

## Supplementary Tables

**Supplementary Table S1.** Details of the source soil sample and metagenomic libraries constructed for TCS resistance screening.

| <b>Sample source</b>           | <b>Sample code</b> | <b>No. of pools</b> | <b>No. of clones</b> | <b>pH</b> | <b>Organic (%)</b> | <b>Ca (mg/kg)</b> | <b>Mg (mg/kg)</b> | <b>K (mg/kg)</b> | <b>Na (mg/kg)</b> | <b>P (mg/kg)</b> | <b>Cu (mg/kg)</b> |
|--------------------------------|--------------------|---------------------|----------------------|-----------|--------------------|-------------------|-------------------|------------------|-------------------|------------------|-------------------|
| Industrially contaminated soil | ICS                | 87                  | 78,600               | 6.58      | 14.98              | 2025.50           | 59.32             | 277.51           | 358.17            | 63.22            | 1055.00           |
| Alluvial soil                  | AS                 | 73                  | 48,800               | 5.7       | 42.08              | 9661.05           | 9081.54           | 12218            | 982.15            | 1227.77          | 9.4               |

**Supplementary Table S2.** Taxonomic assignment of metagenome derived clone.

| Clone Name | Assigned taxonomy by RA1phy                                                                                                              |
|------------|------------------------------------------------------------------------------------------------------------------------------------------|
| pA         | <i>Proteobacteria</i> / <i>Gammaproteobacteria</i> / <i>Alteromonadales</i> / <i>Shewanellaceae</i> / <i>Shewanella</i>                  |
| pAB1       | <i>Proteobacteria</i> / <i>Alphaproteobacteria</i> / <i>Rhodobacterales</i> / <i>Rhodobacteraceae</i> / <i>Pseudovibrio</i>              |
| pAF1-5     | <i>Proteobacteria</i> / <i>Gammaproteobacteria</i> / <i>Chromatiales</i> / <i>Chromatiaceae</i> / <i>Nitrosococcus</i>                   |
| pAH4       | <i>Proteobacteria</i> / <i>Betaproteobacteria</i> / <i>Gallionellales</i> / <i>Gallionellaceae</i> / <i>Sideroxydans</i>                 |
| pAL1-4     | <i>Proteobacteria</i> / <i>Alphaproteobacteria</i> / <i>Rhodobacterales</i> / <i>Rhodobacteraceae</i> / <i>Pseudovibrio</i>              |
| pAM1       | <i>Firmicutes</i> / <i>Bacilli</i> / <i>Bacillales</i> / <i>Bacillaceae</i> / <i>Bacillus</i>                                            |
| pAQ2       | <i>Proteobacteria</i> / <i>Betaproteobacteria</i> / <i>Burkholderiales</i> / <i>Burkholderiaceae</i> / <i>Cupriavidus</i>                |
| pAT4       | <i>Firmicutes</i> / <i>Bacilli</i> / <i>Bacillales</i> / <i>Alicyclobacillaceae</i> / <i>Sulfobacillus</i>                               |
| pAU2       | <i>Proteobacteria</i> / <i>Gammaproteobacteria</i> / <i>Acidithiobacillales</i> / <i>Acidithiobacillaceae</i> / <i>Acidithiobacillus</i> |
| pAV2       | <i>Proteobacteria</i> / <i>Gammaproteobacteria</i> / <i>Methylococcales</i> / <i>Methylococcaceae</i> / <i>Methylococcus</i>             |
| pAY2-1     | <i>Proteobacteria</i> / <i>Gammaproteobacteria</i> / <i>Enterobacteriales</i> / <i>Enterobacteriaceae</i> / <i>Escherichia</i>           |
| pB-1       | <i>Acidobacteria</i> / <i>Acidobacteria</i> / <i>Acidobacteriales</i> / <i>Acidobacteriaceae</i> / <i>Granulicella</i>                   |
| pBB2       | <i>Chlamydiae</i> / <i>Chlamydiae</i> / <i>Chlamydiales</i> / <i>Simkaniaceae</i> / <i>Simkania</i>                                      |
| pBF1-4     | <i>Proteobacteria</i> / <i>Epsilonproteobacteria</i> / <i>Campylobacterales</i> / <i>Helicobacteraceae</i> / <i>Sulfuricurvum</i>        |
| pD-1       | <i>Verrucomicrobia</i> / <i>Opitutae</i> / <i>Puniceococcales</i> / <i>Puniceococcaceae</i> / <i>Coralimargarita</i>                     |
| pJ         | <i>Proteobacteria</i> / <i>Gammaproteobacteria</i> / <i>Aeromonadales</i> / <i>Aeromonadaceae</i> / <i>Aeromonas</i>                     |
| pL-1       | <i>Proteobacteria</i> / <i>Epsilonproteobacteria</i> / <i>Campylobacterales</i> / <i>Helicobacteraceae</i> / <i>Sulfuricurvum</i>        |
| pQ-2       | <i>Proteobacteria</i> / <i>Epsilonproteobacteria</i> / <i>Campylobacterales</i> / <i>Helicobacteraceae</i> / <i>Sulfuricurvum</i>        |
| pQ2N       | <i>Proteobacteria</i> / <i>Epsilonproteobacteria</i> / <i>Campylobacterales</i> / <i>Helicobacteraceae</i> / <i>Sulfuricurvum</i>        |
| pW-1       | <i>Chlamydiae</i> / <i>Chlamydiae</i> / <i>Chlamydiales</i> / <i>Waddliaceae</i> / <i>Waddlia</i>                                        |
| pX-1N      | <i>Actinobacteria</i> / <i>Actinobacteria</i> / <i>Actinomycetales</i> / <i>Propionibacteriaceae</i> / <i>Microthunus</i>                |
| pY-3       | <i>Proteobacteria</i> / <i>Epsilonproteobacteria</i> / <i>Campylobacterales</i> / <i>Helicobacteraceae</i> / <i>Sulfuricurvum</i>        |
| pAZ2       | <i>Proteobacteria</i> / <i>Deltaproteobacteria</i> / <i>Desulfuromonadales</i> / <i>Desulfuromonadaceae</i> / <i>Pelobacter</i>          |
| pAY4-2     | <i>Proteobacteria</i> / <i>Deltaproteobacteria</i> / <i>Desulfuromonadales</i> / <i>Geobacteraceae</i> / <i>Geobacter</i>                |
| pBC1       | <i>Proteobacteria</i> / <i>Epsilonproteobacteria</i> / <i>Campylobacterales</i> / <i>Helicobacteraceae</i> / <i>Sulfuricurvum</i>        |
| pBE3-1     | <i>unknown phylum</i> / <i>unknown class</i> / <i>unknown order</i> / <i>unknown family</i> / <i>Candidatus</i>                          |
| pAY4-1     | <i>Proteobacteria</i> / <i>Deltaproteobacteria</i> / <i>Desulfuromonadales</i> / <i>Geobacteraceae</i> / <i>Geobacter</i>                |
| pAW1       | <i>Proteobacteria</i> / <i>Betaproteobacteria</i> / <i>Nitrosomonadales</i> / <i>Nitrosomonadaceae</i> / <i>Nitrosospira</i>             |
| pAX1       | <i>unknown phylum</i> / <i>unknown class</i> / <i>unknown order</i> / <i>unknown family</i> / <i>Candidatus</i>                          |
| pAP3       | <i>Proteobacteria</i> / <i>Betaproteobacteria</i> / <i>Burkholderiales</i> / <i>Burkholderiaceae</i> / <i>Ralstonia</i>                  |
| pAG2       | <i>Planctomycetes</i> / <i>Planctomycetacia</i> / <i>Planctomycetales</i> / <i>Planctomycetaceae</i> / <i>Planctomyces</i>               |
| pR-2       | <i>Proteobacteria</i> / <i>Epsilonproteobacteria</i> / <i>Campylobacterales</i> / <i>Helicobacteraceae</i> / <i>Sulfuricurvum</i>        |



**Supplementary Table S3.** Triclosan susceptibility based grouping of metagenome derived ENRs.

| <b>Groups</b>                                                                                    | <b>MIC (<math>\mu\text{g/ml}</math>)</b> | <b>Fold increase in MIC</b> |
|--------------------------------------------------------------------------------------------------|------------------------------------------|-----------------------------|
| <b>Group I</b> (388-722- fold increase in MIC)<br>(Highly triclosan tolerant ENR homologues)     |                                          |                             |
| pBC1-1*                                                                                          | 650                                      | 722                         |
| pBF1-5*                                                                                          | 650                                      | 722                         |
| pQ2N-2*                                                                                          | 650                                      | 722                         |
| pQ-2-3*                                                                                          | 650                                      | 722                         |
| pL-2*                                                                                            | 650                                      | 722                         |
| pY-4*                                                                                            | 650                                      | 722                         |
| pR-2-3*                                                                                          | 650                                      | 722                         |
| pB-1-5*                                                                                          | 650                                      | 722                         |
| pA-3*                                                                                            | 650                                      | 722                         |
| pJ-1-5*                                                                                          | 650                                      | 722                         |
| pAY2-2                                                                                           | 350                                      | 388                         |
| pAM1-4*                                                                                          | 650                                      | 722                         |
| pD-1-7*                                                                                          | 650                                      | 722                         |
| <b>Group II</b> (22-83 fold increase in MIC)<br>(Intermediate triclosan tolerant ENR homologues) |                                          |                             |
| pAZ2-1                                                                                           | 75                                       | 83                          |
| pX-1N                                                                                            | 65                                       | 72                          |
| pAB1-3                                                                                           | 30                                       | 33                          |
| pAF1-6                                                                                           | 20                                       | 22                          |
| pAU2-4                                                                                           | 40                                       | 44                          |
| pAV2-3                                                                                           | 50                                       | 55                          |
| pAY4-3                                                                                           | 20                                       | 22                          |
| <b>Group III</b> (11-16 fold increase in MIC)<br>(Mild triclosan resistant ENR homologues)       |                                          |                             |
| pAQ2-3                                                                                           | 15                                       | 16                          |
| pAT4-3                                                                                           | 10                                       | 11                          |
| pAL1-5                                                                                           | 15                                       | 16                          |

**Symbols;** \*, MIC was not determined for these clones, and the maximum level of triclosan, at which these clones were tested was 650  $\mu\text{g/ml}$ . For the rest of the clones MIC was determined.

**Supplementary Table S4.** Presence of metagenome like YX7K type ENR homologues in obligate intracellular pathogenic bacteria.

| Organism                                           | % ID | Pathogenicity        | Host             | ENR Accession Number | YX7K domain |
|----------------------------------------------------|------|----------------------|------------------|----------------------|-------------|
| <i>Waddlia chondrophila</i> 2032/99                | 77   | Human fetal death    | Humans           | CCB91849             | +           |
| <i>Simkania negevensis</i>                         | 73   | Pneumonia            | Humans           | WP_013943443         | +           |
| <i>Candidatus Protochlamydia amoebophila</i>       | 72   | STD infections       | Humans           | CAF23876.1           | +           |
| <i>Candidatus Protochlamydia amoebophila</i> UWE25 | 72   | No                   | Amoeba           | YP_008151            | +           |
| <i>Chlamydia psittaci</i>                          | 72   | Psittacosis and RTI  | Birds and humans | WP_020350159         | +           |
| <i>Chlamydia pecorum</i>                           | 71   | Reproductive disease | Koala and others | WP_013712757         | +           |
| <i>Chlamydophila caviae</i>                        | 71   | Eye infections       | Guinea pigs      | WP_011006351         | +           |
| <i>Chlamydia psittaci</i> 10_1398_11               | 71   | Psittacosis and RTI  | Birds and humans | EPP35064.1           | +           |
| <i>Parachlamydia acanthamoebae</i>                 | 70   | LRT                  | Humans           | WP_013925330         | +           |
| <i>Chlamydophila pneumoniae</i> CWL029             | 70   | CAP                  | Humans           | NP_224606            | +           |
| <i>Chlamydophila pneumoniae</i> LPCoLN             | 70   | RTI                  | Humans           | ACZ33383.1           | +           |
| <i>Chlamydophila pneumoniae</i> AR39               | 70   | RTI                  | Humans           | AAF38201.1           | +           |
| <i>Chlamydophila pneumoniae</i> CWL029             | 70   | RTI                  | Humans           | NP_224606.1          | +           |
| <i>Chlamydophila pneumoniae</i> J138               | 70   | RTI                  | Humans           | BAA98614.1           | +           |
| <i>Chlamydophila pneumoniae</i> TW-183             | 70   | RTI                  | Humans           | AAP98351.1           | +           |
| <i>Chlamydophila felis</i>                         | 70   | Conjunctivitis       | Cats and humans  | WP_011458172         | +           |
| <i>Chlamydia trachomatis</i> L2c                   | 69   | STD infections       | Humans           | YP_004717235         | +           |
| <i>Chlamydia trachomatis</i>                       | 69   | STD infections       | Humans           | WP_009873559         | +           |
| <i>Chlamydophila abortus</i> S26/3                 | 69   | Abortion/fetal death | Mammals/humans   | YP_219792            | +           |
| <i>Chlamydia psittaci</i> NJ1                      | 69   | Diarrhea             | goats and sheep  | YP_006740504         | +           |
| <i>Chlamydia trachomatis</i> 434_Bu                | 69   | STD infections       | Humans           | YP_001654443         | +           |
| <i>Chlamydia suis</i>                              | 69   | Conjunctivitis       | Swine            | WP_035405642         | +           |
| <i>Chlamydia avium</i>                             | 69   | Miscellaneous        | Pigeons/birds    | WP_038500200         | +           |
| <i>Chlamydia trachomatis</i> A_HAR-13              | 68   | STD infections       | Humans           | AAX50356.1           | +           |
| <i>Chlamydia trachomatis</i> B_Jali20_OT           | 68   | STD infections       | Humans           | CAX10551.1           | +           |
| <i>Chlamydia trachomatis</i> D_UW-3_CX             | 68   | STD infections       | Humans           | NP_219607.1          | +           |
| <i>Chlamydia trachomatis</i> D-EC                  | 68   | STD infections       | Humans           | ADI50779.1           | +           |
| <i>Chlamydia trachomatis</i> D-LC                  | 68   | STD infections       | Humans           | ADI51791.1           | +           |
| <i>Chlamydia trachomatis</i> E_150                 | 68   | STD infections       | Humans           | ADH16869.1           | +           |
| <i>Chlamydia trachomatis</i> G_11222               | 68   | STD infections       | Humans           | ADH18713.1           | +           |
| <i>Chlamydia trachomatis</i> E_11023               | 68   | STD infections       | Humans           | ADH20562.1           | +           |

**Abbreviations and symbols;** ID, Identity to metagenomic YX7K type ENRs; RTI, Respiratory tract infections; STD, Sexually transmitted disease; +, Present; LRT, Lower respiratory tract infections; CAP, Community-acquired pneumonia.

**Supplementary Table S5.** Presence of metagenome like YX7K type ENRs in apicomplexa obligate intracellular pathogens.

| <b>Organism</b>                      | <b>% ID</b> | <b>Disease</b> | <b>Host</b>          | <b>ENR Accession Number</b> | <b>YX7K domain</b> |
|--------------------------------------|-------------|----------------|----------------------|-----------------------------|--------------------|
| <i>Toxoplasma gondii</i>             | 63          | Toxoplasmosis  | Humans/Animals       | XP_002367432                | +                  |
| <i>Hammondia hammondi</i>            | 63          | Not reported   | Warm blooded animals | KEP61065                    | +                  |
| <i>Eimeria Tenella</i>               | 59          | Coccidiosis    | Poultry              | 2PTG A                      | +                  |
| <i>Eimeria brunetti</i>              | 54          | Coccidiosis    | Poultry              | CDJ50922                    | +                  |
| <i>Plasmodium cynomolgi strain B</i> | 52          | Malaria        | Primates             | XP_004223347                | +                  |
| <i>Plasmodium knowlesi strain H</i>  | 52          | Malaria        | Primates             | XP_002261521                | +                  |
| <i>Plasmodium inui San Antonio</i>   | 52          | Malaria        | Primates             | EUD68469                    | +                  |
| <i>Plasmodium chabaudi chabaudi</i>  | 51          | Malaria        | Rodents              | XP_745177                   | +                  |
| <i>Plasmodium Berghei</i>            | 51          | Malaria        | Mammals              | 3F4B_A                      | +                  |
| <i>Neospora caninum Liverpool</i>    | 50          | Neosporosis    | Canids and cattles   | XP_003886297                | +                  |
| <i>Plasmodium Falciparum</i>         | 46          | Malaria        | Humans               | 2O2Y_A                      | +                  |

**Abbreviations and symbols;** ID, Identity to metagenomic YX7K type ENRs; +, Present.

**Supplementary Table S6.** Organisms with metagenomic 7-alpha-hydroxysteroid dehydrogenase (7- $\alpha$ -HSDH) like ENR homologues.

| <b>Organism</b>                      | <b>ENR Accession Number</b> | <b>% Identity to 7-<math>\alpha</math>-HSDH</b> | <b>Importance of the organism</b> | <b>Potential host</b> |
|--------------------------------------|-----------------------------|-------------------------------------------------|-----------------------------------|-----------------------|
| <i>Sulfuricurvum sp.</i>             | WP_015653931                | 96                                              | Sulfur oxidizing                  | None                  |
| <i>Nitratifactor salsuginis</i>      | WP_013553872                | 82                                              | Denitrifying bacteria             | None                  |
| <i>Arcobacter butzleri</i>           | WP_004509057                | 74                                              | Potential enteropathogen          | Humans/others         |
| <i>Arcobacter cibarius</i>           | WP_024776121                | 73                                              | Potential enteropathogen          | Broiler               |
| <i>Nautilia profundicola</i>         | WP_015902546                | 74                                              | Sulfur-reducing bacteria          | None                  |
| <i>Arcobacter nitrofigilis</i>       | WP_013135927                | 70                                              | Symbiotic organism                | None                  |
| <i>Campylobacter showae</i>          | WP_002950625                | 72                                              | Oral cavity gingivitis            | Humans                |
| <i>Campylobacter rectus</i>          | WP_004320005                | 71                                              | Chronic periodontitis             | Humans                |
| <i>Campylobacter concisus</i>        | WP_021089130                | 71                                              | Emergent pathogen                 | Humans                |
| <i>Caminibacter mediatlanticus</i>   | WP_007474398                | 72                                              | Chemolithoautotroph               | None                  |
| <i>Campylobacter upsaliensis</i>     | WP_004277624                | 70                                              | Gastroenteritis and bacteremia    | Pets/humans           |
| <i>Sulfurospirillum arcachonense</i> | WP_024954653                | 69                                              | Sulfur reduction                  | None                  |
| <i>Campylobacter jejuni</i>          | WP_004297961                | 69                                              | Food borne pathogen               | Humans                |
| <i>Sulfuricurvum kujiense</i>        | WP_013459792                | 70                                              | Sulfur-oxidizing bacterium        | None                  |
| <i>Sulfurospirillum barnesii</i>     | WP_014769378                | 70                                              | Arsenate-reducing                 | None                  |
| <i>Campylobacter curvus</i>          | WP_018136240                | 70                                              | Bloody or chronic diarrhea.       | Humans                |
| <i>Helicobacter pylori</i>           | WP_025275758                | 69                                              | Cause Gastric Ulcer               | Humans                |
| <i>Helicobacter Magdeburgensis</i>   | KGL14935                    | 70                                              | Potential intestinal pathogen     | Mice                  |
| <i>Helicobacter pametensis</i>       | WP_027327035                | 67                                              | Found in birds and swine          | Not known             |
| <i>Helicobacter macacae</i>          | WP_023926757                | 68                                              | Colitis and adenocarcinoma        | Rhesus                |
| <i>Helicobacter winghamensis</i>     | WP_006803026                | 67                                              | Gastroenteritis                   | Humans                |
| <i>Helicobacter trogonu</i>          | KGL33062                    | 69                                              | Ulcerative Typhlocolitis          | Mice                  |
| <i>Sulfurospirillum deleyianum</i>   | WP_012856842                | 69                                              | Nitrite reduction                 | None                  |
| <i>Campylobacter lari</i>            | WP_012661337                | 69                                              | Joint infection and Bacteremia    | Humans                |
| <i>Helicobacter bilis</i>            | WP_005219380                | 69                                              | Inflammatory bowel disease        | SCID mice             |
| <i>Helicobacter hepaticus</i>        | WP_011116467                | 69                                              | Chronic hepatitis                 | Mice                  |

**Supplementary Table S7.** Organisms with metagenomic FabG like ENR carrying organisms.

| <b>Organism</b>                            | <b>Accession Number</b> | <b>Identity %</b> | <b>Importance of the organism</b>                       |
|--------------------------------------------|-------------------------|-------------------|---------------------------------------------------------|
| <i>Melioribacter roseus</i>                | WP_014854970            | 66                | Cellulytic bacteria                                     |
| <i>Sphaerobacter thermophilus</i>          | YP_003319251            | 56                | Bioremediation                                          |
| <i>Ignavibacterium album JCM 16511</i>     | YP_005845733            | 57                | Chemoheterotroph                                        |
| <i>Thermomicrobium roseum</i>              | YP_002521522            | 57                | Thermophilic bacterium                                  |
| <i>Deferrisoma camini</i>                  | YP_002521522            | 56                | Iron(III)-reducing bacterium                            |
| <i>Candidatus Methylomirabilis oxyfera</i> | YP_003207365            | 53                | Methane-oxidizing bacterium                             |
| <i>Caldithrix abyssii</i>                  | WP_006928872            | 52                | Nitrate reducing bacterium                              |
| <i>Candidatus Solibacter usitatus</i>      | YP_823431               | 51                | Thermophilic bacterium                                  |
| <i>Melioribacter roseus</i>                | YP_006526546            | 52                | Thermophilic cellulolytic bacterium                     |
| <i>Nitrolancea hollandica</i>              | WP_008476078            | 51                | Nitrite-oxidizing bacterium                             |
| <i>Streptomyces bingchengensis</i>         | YP_004965000            | 50                | Production of milbemycins and nanchangmycin             |
| <i>Streptomyces violaceusnige</i>          | YP_004817797            | 47                | Used as a biocontrol agent                              |
| <i>Streptomyces hygroscopicus</i>          | WP_030839918            | 48                | Production of rapamycin (Sirolimus) drug                |
| <i>Streptomyces globisporus</i>            | WP_010058228            | 50                | Production of the Eneidyne antitumor antibiotic C-1027  |
| <i>Streptomyces anulatus</i>               | WP_030590816            | 48                | Production of Telomestatin and Endophenazines A-D       |
| <i>Streptomyces floridae</i>               | WP_030340953            | 50                | Production of antimicrobial Viomycin                    |
| <i>Streptomyces flavotricini</i>           | WP_030032568            | 45                | Production of Bafilomycin K, a new antifungal macrolide |
| <i>Streptomyces avermitilis</i>            | NP_824835               | 45                | Production of Avermectins and abamectin                 |
| <i>Salinispora arenicola</i>               | WP_018809491            | 44                | Produce salinosporamide, a potential anti-cancer agent  |

**Supplementary Table S8.** Metagenomic triclosan resistant clones with no known ENR homologues.

| No. | Clone  | ENR/known TCS <sup>R</sup><br>Gene candidate        | Efflux<br>pumps                                               |
|-----|--------|-----------------------------------------------------|---------------------------------------------------------------|
| 1   | pBE3   | -                                                   | 1. OM<br>Efflux<br>2. MFS <sup>T</sup><br>3. MFS <sup>T</sup> |
| 2   | pAY4-1 | -                                                   | ABC<br>transporters                                           |
| 3   | pAW1   | -                                                   | -                                                             |
| 4   | pAX1   | -                                                   | -                                                             |
| 5   | pAP3   | -                                                   | MFS <sup>T</sup>                                              |
| 6   | pAG2   | -                                                   | 1. MFS <sup>T</sup><br>2. Hydrolase                           |
| 7   | pW-1   | -                                                   | ABC<br>transporters                                           |
| 8   | pAH4   | Hypothetical protein<br>like Novel ENR<br>candidate | ABC<br>transporter                                            |
| 9   | pBB2-1 | <i>acrB</i> (partial)                               | <i>acrB</i><br>(partial)                                      |

**Symbols and Abberviations:** -; absent, TCS<sup>R</sup>; Triclosan resistant, MFS<sup>T</sup>;  
MFS transporter, OM; Outer membrane, *acrB*; Acriflavine resistance protein B.

**Supplementary Table S9.** List of open reading frames from a metagenomic clone, pBE3, and closely related proteins in GenBank.

| ORF             | No. of amino acids | Closely related proteins (organisms)                                                       | % Identity |
|-----------------|--------------------|--------------------------------------------------------------------------------------------|------------|
| 1 <sup>a</sup>  | 37                 | Transposase [ <i>Escherichia coli</i> ]                                                    | 100        |
| 2 <sup>b</sup>  | 349                | Putative outer membrane efflux protein [ <i>Nitrospira defluvii</i> ]                      | 97         |
| 3               | 160                | Hypothetical protein [ <i>Nitrospira defluvii</i> ]                                        | 96         |
| 4               | 62                 | Hypothetical protein [ <i>Nitrospira defluvii</i> ]                                        | 24         |
| 5               | 357                | Glycosyl transferase [ <i>Nitrospira defluvii</i> ]                                        | 98         |
| 6 <sup>c</sup>  | 426                | MFS transporter [ <i>Nitrospira defluvii</i> ]                                             | 98         |
| 7               | 323                | Hypothetical protein [ <i>Nitrospira defluvii</i> ]                                        | 93         |
| 8 <sup>d</sup>  | 441                | MFS transporter [ <i>Nitrospira defluvii</i> ]                                             | 97         |
| 9               | 730                | Amylo-alpha-1,6-glucoSIDase [ <i>Nitrospira defluvii</i> ]                                 | 97         |
| 10              | 546                | Putative peptidase [ <i>Nitrospira defluvii</i> ]                                          | 82         |
| 11              | 145                | Hypothetical protein [ <i>Nitrospira defluvii</i> ]                                        | 92         |
| 12              | 81                 | Hypothetical protein [ <i>Nitrospira defluvii</i> ]                                        | 94         |
| 13              | 276                | Hypothetical protein [ <i>Nitrospira defluvii</i> ]                                        | 82         |
| 14              | 99                 | RNA-binding protein [uncultured bacterium A1Q1_fos_560]                                    | 98         |
| 15              | 450                | ATP-dependent RNA helicase [ <i>Nitrospira defluvii</i> ]                                  | 97         |
| 16              | 177                | Putative FKBP-type peptidyl-prolyl cis-trans isomerase SlyD [ <i>Nitrospira defluvii</i> ] | 97         |
| 17 <sup>e</sup> | 421                | Transposase [ <i>Nitrospira defluvii</i> ]                                                 | 96         |
| 18              | 316                | Putative aldose 1-epimerase [ <i>Nitrospira defluvii</i> ]                                 | 93         |
| 19              | 587                | Hypothetical protein [ <i>Nitrospira defluvii</i> ]                                        | 84         |
| 20              | 176                | Hypothetical protein [ <i>Nitrospira defluvii</i> ]                                        | 88         |
| 21              | 339                | UDP-glucose 4-epimerase [ <i>Nitrospira defluvii</i> ]                                     | 92         |
| 22              | 406                | Hypothetical protein [ <i>Nitrospira defluvii</i> ]                                        | 75         |
| 23              | 43                 | Hypothetical protein [ <i>Nitrospira defluvii</i> ]                                        | 50         |
| 24              | 297                | GTP-binding protein YchF [ <i>Nitrospira defluvii</i> ]                                    | 95         |

<sup>a,e</sup> *orf1,17* encodes mobile elements signatures. <sup>b, c, d</sup> *orf2, 6, 8* encodes efflux pumps, which might be responsible for the observed resistance to other antibiotics.

**Supplementary Table S10.** List of open reading frames from a metagenomic clone, pAY4-1, and closely related proteins in GenBank.

| ORF             | No. of amino acids | Closely related proteins (organisms)                                                                   | % Identity |
|-----------------|--------------------|--------------------------------------------------------------------------------------------------------|------------|
| 1 <sup>a</sup>  | 208                | ABC transporter ATP-binding protein [ <i>Geobacter pickeringii</i> ]                                   | 58         |
| 2               | 312                | Periplasmic solute binding protein [ <i>Geobacter uraniireducens</i> ]                                 | 54         |
| 3               | 143                | Fur family transcriptional regulator [ <i>Geobacter uraniireducens</i> ]                               | 58         |
| 4               | 498                | Histidine kinase [ <i>Desulfuromonas</i> sp. TF]                                                       | 43         |
| 5               | 146                | Chemotaxis protein CheY [ <i>Desulfovibrio alkaliphilus</i> ]                                          | 71         |
| 6               | 484                | Histidine kinase [delta <i>proteobacterium</i> MLMS-1]                                                 | 49         |
| 7 <sup>b</sup>  | 326                | ABC transporter, [ <i>Candidatus Methanoperedens nitroreducens</i> ]                                   | 49         |
| 8               | 66                 | Hypothetical protein [ <i>Desulfuromonas</i> sp. TF]                                                   | 25         |
| 9               | 452                | DNA repair protein RadaA [ <i>Desulfuromonas</i> sp. TF]                                               | 80         |
| 10              | 166                | Molybdenum cofactor biosynthesis protein MoaC [ <i>Desulfuromonas</i> sp. TF]                          | 74         |
| 11              | 169                | Hypothetical protein [ <i>Desulfuromonas</i> sp. TF]                                                   | 42         |
| 12              | 118                | Conjugal transfer protein TraR [ <i>Desulfuromonas</i> sp. TF]                                         | 83         |
| 13              | 445                | Histidine kinase [ <i>Desulfuromonas</i> sp. TF]                                                       | 41         |
| 15              | 146                | Hypothetical protein [ <i>Desulfuromonas</i> sp. TF]                                                   | 56         |
| 16              | 624                | B12-binding domain-containing radical SAM protein [ <i>Geobacter</i> sp. OR-1]                         | 52         |
| 17              | 66                 | Cold-shock protein [ <i>Desulfuromonas</i> sp. TF]                                                     | 89         |
| 18              | 267                | Hypothetical protein [ <i>Geobacter lovleyi</i> ]                                                      | 85         |
| 19              | 365                | Peptidase M48 Ste24p [ <i>Geobacter lovleyi</i> ]                                                      | 52         |
| 20              | 84                 | Hypothetical protein [ <i>Geoalkalibacter subterraneus</i> ]                                           | 44         |
| 21              | 59                 | Hypothetical protein [ <i>Desulfuromonas</i> sp. WTL]                                                  | 73         |
| 22 <sup>c</sup> | 407                | ABC transporter permease [ <i>Desulfocurvus vexinensis</i> ]                                           | 60         |
| 23 <sup>d</sup> | 416                | ABC-type antimicrobial peptide transport system, permease component [ <i>Desulfovibrio africanus</i> ] | 65         |
| 24 <sup>e</sup> | 225                | Macrolide ABC transporter ATP-binding protein [ <i>Pelobacter carbinolicus</i> ]                       | 71         |
| 25 <sup>f</sup> | 56                 | Putative transposase [ <i>Escherichia coli</i> ]                                                       | 100        |

<sup>a, b, c, d, e</sup>orf1, 7, 22, 23, 24 encodes various efflux pumps protein homologues. <sup>f</sup>orf,25 encodes mobile elements signatures homologues.



**Supplementary Table S11.** List of open reading frames from a metagenomic clone, pAW1, and closely related proteins in GenBank.

| ORF            | No. of amino acids | Closely related proteins (organisms)                                                                      | % Identity |
|----------------|--------------------|-----------------------------------------------------------------------------------------------------------|------------|
| 1 <sup>a</sup> | 202                | Cytochrome D ubiquinol oxidase subunit I ( <i>Ignavibacterium album</i> )                                 | 61         |
| 2 <sup>b</sup> | 338                | Cytochrome D oxidase subunit I ( <i>Ignavibacterium album</i> )                                           | 64         |
| 3              | 163                | Putative metal-dependent hydrolase YfiT ( <i>Candidatus Scalindua brodae</i> )                            | 47         |
| 4 <sup>c</sup> | 451                | Deoxyribodipyrimidine photo-lyase (candidate division TM6 bacterium GW2011_GWF2_36_6)                     | 50         |
| 5              | 15                 | tRNA-Glu ( <i>Candidatus Scalindua brodae</i> )                                                           | 36         |
| 6              | 165                | Phenylacetic acid degradation protein ( <i>Lysobacter dokdonensis</i> )                                   | 41         |
| 7              | 442                | Hypothetical protein ( <i>Desulfotulbus japonicus</i> )                                                   | 33         |
| 8              | 442                | Acetoacetate metabolism regulatory protein AtoC ( <i>Desulfotomaculum kuznetsovii</i> )                   | 50         |
| 9              | 346                | PREDICTED: filamin-A-interacting protein 1 isoform X2 ( <i>Larimichthys crocea</i> )                      | 22         |
| 10             | 419                | Elongator complex protein 1 isoform 2 ( <i>Galdieria sulphuraria</i> )                                    | 32         |
| 11             | 56                 | Hypothetical protein                                                                                      | 29         |
| 12             | 858                | FG-GAP repeat protein (candidate division <i>Zixibacteria bacterium</i> RBG-1)                            | 31         |
| 13             | 239                | MULTISPECIES: porin ( <i>Hyphomicrobium</i> )                                                             | 25         |
| 14             | 210                | Membrane protein ( <i>Sphingobium herbicidovorans</i> )                                                   | 32         |
| 15             | 246                | Hypothetical protein ( <i>Chlorobaculum tepidum</i> )                                                     | 40         |
| 16             | 210                | LemA family protein ( <i>Butyrimonas synergistica</i> )                                                   | 44         |
| 17             | 39                 | Hypothetical protein                                                                                      | 34         |
| 18             | 487                | Hypothetical protein ( <i>Hydrocarboniphaga effusa</i> )                                                  | 48         |
| 19             | 182                | Hypothetical protein ( <i>Geobacillus vulcani</i> )                                                       | 25         |
| 20             | 355                | UDP-N-acetylglucosamine 2-epimerase ( <i>Prolixibacter bellariivorans</i> )                               | 58         |
| 21             | 475                | Class V aminotransferase ( <i>miscellaneous Crenarchaeota</i> group archaeon SMTZ-80)                     | 50         |
| 22             | 403                | Group 1 glycosyl transferase ( <i>Bacillus vireti</i> )                                                   | 33         |
| 23             | 169                | Hypothetical protein ( <i>Myxococcus stipitatus</i> )                                                     | 37         |
| 24             | 272                | Hypothetical protein AMJ73_07090 (candidate division <i>Zixibacteria bacterium</i> SM1_73)                | 48         |
| 25             | 118                | Hypothetical protein HISP_01140 ( <i>Haloarcula hispanica</i> N601)                                       | 37         |
| 26             | 323                | Platelet-activating factor acetylhydrolase plasma/intracellular isoform II ( <i>Pedosphaera parvula</i> ) | 38         |
| 27             | 107                | RNA-binding protein ( <i>Ornatilinea apprima</i> )                                                        | 67         |
| 28             | 224                | Heavy metal translocating P-type ATPase, partial ( <i>uncultured bacterium</i> )                          | 45         |
| 29             | 328                | Hypothetical protein RBG1_1C00001G0462 (candidate division <i>Zixibacteria bacterium</i> RBG-1)           | 42         |
| 30             | 84                 | Hypothetical protein ( <i>Prochlorothrix hollandica</i> )                                                 | 56         |
| 31             | 255                | Hypothetical protein AA931_11155 ( <i>Peptococcaceae bacterium</i> 1109)                                  | 39         |
| 32             | 403                | Sodium/hydrogen exchanger ( <i>Anaeromyxobacter</i> sp. K)                                                | 49         |
| 33             | 92                 | Hypothetical protein AMJ41_03200 (candidate division <i>Zixibacteria bacterium</i> DG_27)                 | 56         |
| 34             | 134                | Hypothetical protein RBG1_1C00001G0145 (candidate division <i>Zixibacteria bacterium</i> RBG-1)           | 34         |
| 35             | 287                | ATP synthase subunit A (candidate division WOR_1 <i>bacterium</i> DG_54_3)                                | 53         |
| 36             | 78                 | ATP synthase subunit C (candidate division <i>Zixibacteria bacterium</i> DG_27)                           | 68         |
| 37             | 160                | ATP synthase subunit b (candidate division <i>Zixibacteria bacterium</i> RBG-1)                           | 47         |
| 38             | 182                | Hypothetical protein RBG1_1C00001G0149 (candidate division <i>Zixibacteria bacterium</i> RBG-1)           | 38         |
| 39             | 502                | ATP synthase subunit alpha (candidate division <i>Zixibacteria bacterium</i> RBG-1)                       | 74         |
| 40             | 289                | Hypothetical protein AMJ41_03210 (candidate division <i>Zixibacteria bacterium</i> DG_27)                 | 51         |
| 41             | 40                 | Hypothetical protein                                                                                      | 26         |

<sup>a, b</sup>orf1,2 encodes oxidases whereas <sup>c</sup>orf4 encodes photolyases homologues.

**Supplementary Table S12.** List of open reading frames from a metagenomic clone, pAX1, and closely related proteins in GenBank.

| ORF             | No. of amino acids | Closely related proteins (organisms)                                                                      | % Identity |
|-----------------|--------------------|-----------------------------------------------------------------------------------------------------------|------------|
| 1               | 200                | Hypothetical protein AMJ49_05165 ( <i>Parcubacteria bacterium</i> DG_74_2)                                | 47         |
| 2               | 79                 | Hypothetical protein ( <i>Paenibacillus</i> sp. DMB20)                                                    | 49         |
| 3               | 794                | Phosphoenolpyruvate synthase ( <i>Leptolinea tardivitalis</i> )                                           | 56         |
| 4               | 377                | Hypothetical protein ADN00_01570 ( <i>Ornatilinea apprima</i> )                                           | 66         |
| 5               | 66                 | Hypothetical protein ( <i>Calothrix</i> sp. PCC 7103)                                                     | 52         |
| 6               | 53                 | Hypothetical protein ( <i>Calothrix</i> sp. PCC 7103)                                                     | 58         |
| 7               | 111                | Hypothetical protein ( <i>Coleofasciculus chthonoplastes</i> )                                            | 36         |
| 8               | 640                | Hypothetical protein LARV_03539 ( <i>Longilinea arvoryzae</i> )                                           | 39         |
| 9               | 158                | Lprotein containing umazine-binding domain ( <i>Leptolinea tardivitalis</i> )                             | 41         |
| 10              | 600                | Oligoendopeptidase, pepF/M3 family ( <i>Anaerolinea thermolimos</i> )                                     | 60         |
| 11              | 98                 | Hypothetical protein ( <i>Anaerolinea thermophile</i> )                                                   | 51         |
| 12              | 132                | Glyoxalase ( <i>Phyllobacterium</i> sp. YR531)                                                            | 60         |
| 13              | 80                 | Cupin ( <i>Ardenticatena maritima</i> )                                                                   | 59         |
| 14              | 391                | Acyl-CoA dehydrogenase ( <i>Leeia oryzae</i> )                                                            | 80         |
| 15              | 428                | Glutamate dehydrogenase ( <i>Anaerolinea thermophila</i> )                                                | 77         |
| 16              | 255                | Hypothetical protein AMJ88_12270 ( <i>Anaerolineae bacterium</i> SM23_63)                                 | 48         |
| 17              | 152                | Hypothetical protein LTAR_01880 ( <i>Leptolinea tardivitalis</i> )                                        | 67         |
| 18              | 366                | Dihydroorotate oxidase A ( <i>Longilinea arvoryzae</i> )                                                  | 50         |
| 19              | 516                | Hypothetical protein ( <i>Ktedonobacter racemifer</i> )                                                   | 23         |
| 20              | 306                | GCN5 family acetyltransferase [ <i>Clostridiales bacterium</i> mt11]                                      | 37         |
| 21              | 260                | Alpha/beta hydrolase ( <i>Leptospira inadai</i> )                                                         | 39         |
| 22              | 244                | Metallophosphoesterase [ <i>Sphaerochaeta globosa</i> ]                                                   | 41         |
| 23              | 182                | DNA mismatch repair protein MutT [ <i>Clostridium botulinum</i> ]                                         | 41         |
| 24              | 204                | Orotate phosphoribosyltransferase [ <i>Longilinea arvoryzae</i> ]                                         | 66         |
| 25              | 277                | Orotidine-5-phosphate decarboxylase [ <i>Longilinea arvoryzae</i> ]                                       | 58         |
| 26              | 1228               | Hypothetical protein [ <i>Longilinea arvoryzae</i> ]                                                      | 33         |
| 27              | 86                 | Stage V sporulation protein S [ <i>Desulfitobacterium hafniense</i> ]                                     | 56         |
| 28 <sup>a</sup> | 279                | Integrase [ <i>Shigella flexneri</i> ]                                                                    | 99         |
| 29 <sup>b</sup> | 121                | Repressor TnpA [ <i>Shigella sonnei</i> ]                                                                 | 100        |
| 30              | 362                | Dihydroorotase, multifunctional complex type [ <i>Ktedonobacter racemifer</i> ]                           | 36         |
| 31              | 278                | EDD domain protein, DegV family [ <i>Longilinea arvoryzae</i> ]                                           | 51         |
| 32              | 254                | DNA-binding response regulator [ <i>Roseiflexus</i> sp. RS-1]                                             | 35         |
| 33              | 42                 | Hypothetical protein                                                                                      | 31         |
| 34              | 1223               | Hypothetical protein UR29_C0014G0007 [ <i>Microgenomates</i> (Woesebacteria) bacterium GW2011_GWC2_33_12] | 38         |

<sup>a, b</sup>orf28, 29 encodes mobile elements signatures homologues.

**Supplementary Table S13.** List of open reading frames from a metagenomic clone, pAP3, and closely related proteins in GenBank.

| ORF             | No. of amino acids | Closely related proteins (organisms)                                                                 | % Identity |
|-----------------|--------------------|------------------------------------------------------------------------------------------------------|------------|
| 1               | 213                | Hypothetical protein ( <i>Nevskia soli</i> )                                                         | 35         |
| 2               | 216                | Orotate phosphoribosyltransferase ( <i>Nevskia ramosa</i> )                                          | 71         |
| 3               | 277                | DNA-(apurinic or apyrimidinic site) lyase ( <i>Nevskia soli</i> )                                    | 81         |
| 4 <sup>a</sup>  | 466                | MFS transporter ( <i>Xanthomonas albilineans</i> )                                                   | 70         |
| 5               | 198                | GCN5 family acetyltransferase ( <i>Burkholderia ginsengisoli</i> )                                   | 37         |
| 6 <sup>b</sup>  | 344                | Aldo/keto reductase ( <i>Nevskia soli</i> )                                                          | 73         |
| 7               | 299                | Phosphoribulokinase ( <i>Nevskia soli</i> )                                                          | 77         |
| 8               | 239                | tRNA (guanine-N7)-methyltransferase ( <i>Nevskia soli</i> )                                          | 65         |
| 9               | 297                | Thiazole synthase ( <i>Nevskia soli</i> )                                                            | 80         |
| 10              | 65                 | Thiamine biosynthesis protein ThiS ( <i>Marichromatium purpuratum</i> )                              | 58         |
| 11              | 15                 | tRNA-Gly                                                                                             | 35         |
| 12              | 640                | Integrase ( <i>Ralstonia</i> sp. PBA)                                                                | 98         |
| 13              | 206                | LysR family transcriptional regulator ( <i>Ralstonia</i> sp. PBA)                                    | 88         |
| 14              | 101                | MULTISPECIES: transcriptional regulator ( <i>Burkholderiales</i> )                                   | 95         |
| 15              | 632                | Integrating conjugative element relaxase ( <i>Ralstonia</i> sp. PBA)                                 | 88         |
| 16              | 210                | Hypothetical protein ( <i>Pseudomonas putida</i> )                                                   | 75         |
| 17              | 455                | Hypothetical protein ALISP_1550 ( <i>Alicyclophilus</i> sp. B1)                                      | 92         |
| 18              | 287                | Hypothetical protein DO65_1068 ( <i>Burkholderia pseudomallei</i> )                                  | 96         |
| 19              | 488                | Conserved hypothetical protein ( <i>Burkholderia pseudomallei</i> 406e)                              | 87         |
| 20              | 183                | Hypothetical protein ( <i>Achromobacter piechaudii</i> )                                             | 94         |
| 21              | 124                | Hypothetical protein ( <i>Pseudomonas aeruginosa</i> )                                               | 69         |
| 22              | 506                | Membrane protein ( <i>Ralstonia pickettii</i> )                                                      | 91         |
| 23              | 121                | Hypothetical protein ( <i>Ralstonia pickettii</i> )                                                  | 69         |
| 24 <sup>c</sup> | 465                | Integrating conjugative element protein ( <i>Alicyclophilus denitrificans</i> )                      | 97         |
| 25              | 220                | MULTISPECIES: hypothetical protein ( <i>Proteobacteria</i> )                                         | 97         |
| 26              | 374                | Hypothetical protein ( <i>Pectobacterium carotovorum</i> )                                           | 55         |
| 27              | 464                | Hypothetical protein ( <i>Pectobacterium carotovorum</i> )                                           | 29         |
| 28 <sup>d</sup> | 912                | Conjugative transfer ATPase ( <i>Pseudomonas aeruginosa</i> )                                        | 96         |
| 29              | 109                | Hypothetical protein AzCIB_4459 ( <i>Azoarcus</i> sp. CIB)                                           | 91         |
| 30              | 489                | Hypothetical protein ( <i>Pseudomonas aeruginosa</i> )                                               | 95         |
| 31 <sup>e</sup> | 309                | Integrating conjugative element protein, PFL_4704 family ( <i>Alicyclophilus denitrificans</i> K601) | 93         |
| 32 <sup>f</sup> | 230                | Integrating conjugative element protein ( <i>Alicyclophilus denitrificans</i> )                      | 97         |
| 33 <sup>g</sup> | 142                | MULTISPECIES: conjugative transfer region protein ( <i>Proteobacteria</i> )                          | 98         |
| 34 <sup>h</sup> | 124                | MULTISPECIES: integrating conjugative element membrane protein ( <i>Proteobacteria</i> )             | 90         |
| 35              | 38                 | MULTISPECIES: hypothetical protein ( <i>Proteobacteria</i> )                                         | 100        |
| 36              | 67                 | PREDICTED: bromin isoform X3 ( <i>Microcebus murinus</i> )                                           | 41         |
| 37              | 128                | Hypothetical protein ( <i>Pseudomonas aeruginosa</i> )                                               | 87         |
| 38 <sup>i</sup> | 114                | Integrating conjugative element membrane protein ( <i>Pseudomonas aeruginosa</i> )                   | 98         |

<sup>a, b</sup>orf4, 6 encodes MFS transporter and aldo-keto reductase respectively. <sup>c, d, e, f, g, h, i, j, k</sup>orf24, 28, 31, 32, 33, 34, 38 encodes mobile elements signatures homologues.

**Supplementary Table S14.** List of open reading frames from a metagenomic clone, pAG2, and closely related proteins in GenBank.

| <b>ORF</b>     | <b>No. of amino acids</b> | <b>Closely related proteins (organisms)</b>                                | <b>% Identity</b> |
|----------------|---------------------------|----------------------------------------------------------------------------|-------------------|
| 1              | 42                        | Ribose-phosphate pyrophosphokinase partial ( <i>Turicella otitidis</i> )   | 43                |
| 2              | 258                       | IcIR family transcriptional regulator ( <i>Geobacter sulfurreducens</i> )  | 56                |
| 3              | 115                       | Hypothetical protein ( <i>Geobacter</i> sp. M21)                           | 84                |
| 4              | 666                       | SSS sodium solute transporter superfamily ( <i>Geobacter</i> sp. M21)      | 78                |
| 5              | 41                        | Hypothetical protein ( <i>Paramecium tetraurelia</i> strain d4-2)          | 70                |
| 6              | 885                       | Pyruvate phosphate dikinase ( <i>Geobacter lovleyi</i> )                   | 85                |
| 7 <sup>a</sup> | 432                       | MFS transporter ( <i>Geobacter daltonii</i> )                              | 87                |
| 8              | 394                       | Hypothetical protein Geob_2856 ( <i>Geobacter daltonii</i> FRC-32)         | 54                |
| 9              | 430                       | Hypothetical protein ( <i>Geobacter</i> sp. OR-1)                          | 66                |
| 10             | 481                       | DNA helicase ( <i>Geobacter daltonii</i> )                                 | 76                |
| 11             | 401                       | Peptidase U32 ( <i>Geobacter</i> sp. OR-1)                                 | 67                |
| 12             | 303                       | Hypothetical protein ( <i>Geobacter</i> sp. OR-1)                          | 45                |
| 13             | 288                       | Diacylglycerol kinase ( <i>Geobacter sulfurreducens</i> )                  | 41                |
| 14             | 539                       | Lipid A phosphoethanolamine transferase ( <i>Pelobacter carbinolicus</i> ) | 50                |
| 15             | 90                        | Type I citrate synthase ( <i>Geobacter lovleyi</i> )                       | 99                |

<sup>a</sup>. *orf* 6 encodes MFS transporter.

**Supplementary Table S15.** List of open reading frames from a metagenomic clone, pW-1, and closely related proteins in GenBank.

| <b>ORF</b>     | <b>No. of amino acids</b> | <b>Closely related protein (organisms)</b>                    | <b>% Identity</b> |
|----------------|---------------------------|---------------------------------------------------------------|-------------------|
| 1              | 150                       | Hypothetical protein ACD_17C00009G0002 [uncultured bacterium] | 43                |
| 2              | 465                       | Glycyl-tRNA synthetase [ <i>Herpetosiphon aurantiacus</i> ]   | 69                |
| 3 <sup>a</sup> | 261                       | ABC transporter ATPase [ <i>Simkania negevensis</i> ]         | 69                |
| 4 <sup>b</sup> | 400                       | ABC transporter, partial [ <i>Simkania negevensis</i> ]       | 29                |
| 5              | 190                       | Hypothetical protein [ <i>Parachlamydia acanthamoebae</i> ]   | 68                |
| 6              | 372                       | Hypothetical protein [ <i>Simkania negevensis</i> ]           | 42                |
| 7              | 128                       | Hypothetical protein [ <i>Simkania negevensis</i> ]           | 40                |

<sup>a, b</sup> *orf3,4* encodes ABC transporters like homologues, and the DNA sequence determined in pW-1 was partial.

**Supplementary Table S16.** List of open reading frames from a metagenomic clone, pBB2-1, and closely related proteins in GenBank.

| <b>ORF</b>     | <b>No. of amino acids</b> | <b>Closely related protein (organisms)</b>                            | <b>% Identity</b> |
|----------------|---------------------------|-----------------------------------------------------------------------|-------------------|
| 1 <sup>a</sup> | 159                       | Acriflavine resistance protein B [ <i>Tolumonas</i> sp. BRL6-1]       | 52                |
| 2              | 335                       | Hypothetical protein (Partial) [ <i>Simkania negevensis</i> ]-Partial | 32                |

<sup>a</sup> *orf2* encodes *acrB* protein homologue, and the DNA sequence determined in pBB2-1 revealed that this *orf* was covering less than 1/5<sup>th</sup> of the original protein.

**Supplementary Table S17.** List of open reading frames from a metagenomic clone, pAH4, and closely related proteins in GenBank.

| ORF             | No. of amino acids | Closely related protein (organisms)                                                    | % Identity |
|-----------------|--------------------|----------------------------------------------------------------------------------------|------------|
| 1               | 139                | Peptide methionine sulfoxide reductase [ <i>Thiomicrospira crunogena</i> ]             | 82         |
| 2               | 197                | Ferritin [ <i>Herbaspirillum lusitanum</i> ]                                           | 63         |
| 3               | 251                | Spermidine synthase [ <i>Sulfuricella denitrificans</i> ]                              | 73         |
| 4 <sup>a</sup>  | 619                | ABC transporter [ <i>Sulfuricella denitrificans</i> ]                                  | 84         |
| 5               | 173                | Smr protein/MutS2 [ <i>Sideroxydans lithotrophicus</i> ]                               | 70         |
| 6               | 372                | Thioredoxin reductase [ <i>Sideroxydans lithotrophicus</i> ]                           | 90         |
| 7               | 319                | Lytic murein transglycosylase [ <i>Sideroxydans lithotrophicus</i> ]                   | 67         |
| 8               | 150                | Peptidase [ <i>Sulfuritalea hydrogenivorans</i> ]                                      | 55         |
| 9               | 137                | 30S ribosomal protein S6 [ <i>Sideroxydans lithotrophicus</i> ]                        | 94         |
| 10              | 149                | 50S ribosomal protein L9 [ <i>Sideroxydans lithotrophicus</i> ]                        | 90         |
| 11              | 472                | DNA helicase [ <i>Sideroxydans lithotrophicus</i> ]                                    | 88         |
| 12              | 435                | Threonyl-tRNA synthetase [ <i>Sideroxydans lithotrophicus</i> ]                        | 93         |
| 13              | 165                | Translation initiation factor IF-3 [ <i>Sideroxydans lithotrophicus</i> ES-1]          | 87         |
| 14              | 282                | Phenylalanyl-tRNA synthetase subunit alpha [ <i>Sideroxydans lithotrophicus</i> ]      | 86         |
| 15              | 287                | Phenylalanyl-tRNA synthetase subunit beta [ <i>Sideroxydans lithotrophicus</i> ]       | 77         |
| 16              | 250                | Stationary phase survival protein SurE, partial [ <i>Sideroxydans lithotrophicus</i> ] | 82         |
| 17              | 527                | Protein-L-isoaspartate O-methyltransferase [ <i>Burkholderia ambifaria</i> MEX-5]      | 59         |
| 18              | 308                | Peptidase M23 [ <i>Sideroxydans lithotrophicus</i> ]                                   | 45         |
| 19              | 201                | Radical SAM protein [ <i>Sideroxydans lithotrophicus</i> ]                             | 72         |
| 20              | 634                | Prohead protease [ <i>Sideroxydans lithotrophicus</i> ]                                | 82         |
| 21              | 236                | Exonuclease [ <i>Gallionella capsiferriformans</i> ]                                   | 82         |
| 22              | 766                | Sodium transporter [ <i>Sulfuricella</i> sp. T08]                                      | 85         |
| 23              | 318                | Sel1 domain protein repeat-containing protein [ <i>alpha</i> proteobacterium BAL199]   | 53         |
| 24              | 381                | Swarming motility regulation sensor protein RssA [ <i>Ferriphaseselus amnicola</i> ]   | 64         |
| 25              | 260                | Transcriptional regulator [ <i>Sideroxydans lithotrophicus</i> ]                       | 88         |
| 26              | 699                | Sodium:solute symporter [ <i>Sideroxydans lithotrophicus</i> ]                         | 80         |
| 27              | 143                | PEP synthetase regulatory protein [ <i>Thauera</i> sp. 63]                             | 65         |
| 28              | 508                | Aminoacyl-histidine dipeptidase [ <i>Sulfuricella denitrificans</i> skB26]             | 73         |
| 29 <sup>b</sup> | 439                | Hypothetical protein Slit_2509 [ <i>Sideroxydans lithotrophicus</i> ES-1]              | 89         |
| 30              | 63                 | BolA family transcriptional regulator [ <i>Sideroxydans lithotrophicus</i> ]           | 70         |
| 31              | 104                | Glutaredoxin [ <i>Sulfuricella denitrificans</i> ]                                     | 76         |
| 32              | 98                 | Sulfite reductase subunit gamma [ <i>Sideroxydans lithotrophicus</i> ]                 | 80         |
| 33              | 140                | Hypothetical protein [ <i>Sideroxydans lithotrophicus</i> ]                            | 51         |
| 34              | 542                | Hypothetical protein [ <i>Gallionella capsiferriformans</i> ]                          | 62         |

<sup>a</sup> *orf4* encodes ABC transporter. <sup>b</sup> *orf29* encodes a hypothetical protein homologue, which conferred resistance to triclosan and complemented ENR activity *in vivo*.

**Supplementary Table S18.** Occurrence of metagenomic pAH4-4 hypothetical protein homologues in other organisms.

| Organism                                                             | Accession number | % ID | Importance                                           |
|----------------------------------------------------------------------|------------------|------|------------------------------------------------------|
| <sup>α</sup> <i>Sideroxydans lithotrophicus</i> ES-1                 | WP_013030632     | 89   | Iron-oxidizing lithotroph                            |
| <sup>α</sup> <i>Gallionella capsiferriformans</i> ES-2               | WP_013293988     | 81   | Iron-oxidizing lithotroph                            |
| <sup>β</sup> <i>Janthinobacterium agaricidamnosum</i>                | WP_038488551     | 77   | Soft rot pathogen of <i>Agaricus bisporus</i>        |
| <sup>α</sup> <i>Rhodoferax ferrireducens</i> T118                    | WP_011462500     | 75   | Oxidizes acetate with the reduction of Fe(III)       |
| <sup>μ</sup> <i>Massilia timonae</i>                                 | WP_005666707     | 71   | Wound infections in humans                           |
| <sup>□</sup> <i>Rhizobium</i> sp. CF394                              | WP_037137633     | 70   | Able to fix nitrogen                                 |
| <sup>□</sup> <i>Sinorhizobium medicae</i> WSM419                     | WP_011970100     | 70   | In association with medicago plants                  |
| <sup>β</sup> <i>Agrobacterium tumefaciens</i>                        | WP_042616782     | 69   | Crown gall disease in over 140 species of plants     |
| <sup>□</sup> <i>Sinorhizobium</i> sp.                                | WP_037390082     | 68   | Nitrogen fixation                                    |
| <sup>*</sup> <i>Ensifer adhaerens</i>                                | WP_025430578     | 67   | A bacterial predator of bacteria                     |
| <sup>□</sup> <i>Sinorhizobium meliloti</i>                           | WP_027990355     | 67   | Nitrogen fixation, nodulation                        |
| <sup>□</sup> <i>Agrobacterium</i> sp. H13-3 (on plasmid pAspH13-3a.) | WP_013637535     | 66   | Nonpathogenic, model organism for scientific studies |
| <sup>□</sup> <i>Neorhizobium galegae</i>                             | WP_041365593     | 66   | Induce nodules on Galega plants                      |
| <sup>β</sup> <i>Agrobacterium vitis</i>                              | WP_015917294     | 65   | Crown gall disease of grape                          |
| <sup>α</sup> <i>Ruegeria</i> sp. R11                                 | WP_008561783     | 65   | Acylhomoserine lactone producing symbiont            |
| <sup>□</sup> <i>Pseudovibrio</i> sp. FO-BEG1                         | WP_014290257     | 63   | Denitrification                                      |
| <sup>α</sup> <i>Geobacter sulfurreducens</i> PCA                     | WP_010941665     | 53   | Hydrogen and acetate-oxidizing metal-reduction       |
| <sup>α</sup> <i>Geobacter</i> sp. M18                                | WP_015720969     | 50   | Bioremediation                                       |
| <sup>α</sup> <i>Pelobacter propionicus</i> DSM 2379.                 | WP_011736501     | 50   | Ethanol fermentation                                 |
| <sup>α</sup> <i>Geobacter daltonii</i> FRC-32                        | WP_012646832     | 50   | Fe(III)- and uranium(VI)-reducing bacterium          |
| <sup>α</sup> <i>Geobacter uraniireducens</i> Rf4                     | WP_011937857     | 50   | Uranium bioremediation                               |
| <sup>α</sup> <i>Geobacter bemidjensis</i> Bem                        | WP_012531233     | 48   | Iron reduction                                       |
| <sup>*</sup> <i>Bdellovibrio</i> sp. ArHS                            | WP_041873392     | 48   | A bacterial predator of bacteria                     |

**Symbols:**  $\mu$ , bacteria isolated from immunocompromised patients;  $\alpha$ , bacteria related to biogeochemical cycles;  $\beta$ , bacteria pathogenic to plants or fungi;  $\square$ , bacteria that are involve in plant symbiosis, nodulation and nitrogen fixation; \*, bacteria which can attack, penetrate and grow in the intraperiplasmic space of other bacteria.



**Supplementary Table S19.** Table representing various antibiotics which were tested for co/cross resistance.

| <b>No.</b> | <b>Antibiotic</b>  | <b>Major class</b>                   |
|------------|--------------------|--------------------------------------|
| 1          | Ampicillin         | <i>B-Lactam</i>                      |
| 2          | Penicillin G       | <i>B-Lactam</i>                      |
| 3          | Kanamycin          | Aminoglycoside                       |
| 4          | Streptomycin       | Aminoglycoside                       |
| 5          | Amikacin           | Aminoglycoside                       |
| 6          | Sisomicin Sulfate  | Aminoglycoside                       |
| 7          | Tobramycin Sulfate | Aminoglycoside                       |
| 8          | Neomycin Sulfate   | Aminoglycoside                       |
| 9          | Gentamicin         | Aminoglycoside                       |
| 10         | Hygromycin B       | Aminoglycoside                       |
| 11         | Tetracycline       | Polyketide antibiotic                |
| 12         | Cefotaxime         | Cephalosporins                       |
| 13         | Cefdinir           | Cephalosporins                       |
| 14         | Bacitracin         | Cell wall inhibitors                 |
| 15         | Polymyxin B        | Cell wall inhibitors                 |
| 16         | Spectinomycin      | Aminocyclitol class                  |
| 17         | Trimethoprim       | Folic acid synthesis inhibitors      |
| 18         | Chloramphenicol    | Amphenicol                           |
| 19         | Florfenicol        | Synthetic chloramphenicol derivative |

**Supplementary Table S20.** Co/ cross resistance of metagenomic triclosan resistant clones to other antibiotics.

| Metagenomic clone/organism | MIC ( $\mu\text{g/ml}$ ) to different antibiotics |     |     |     |     |     |      |     |     |
|----------------------------|---------------------------------------------------|-----|-----|-----|-----|-----|------|-----|-----|
|                            | Str                                               | Gen | Kan | Neo | Spc | Tet | PolB | Cp  | Amp |
| DH5 $\alpha$ (pUC119)      | 45                                                | 4   | 3.5 | 10  | 21  | 5   | 0.5  | 7.5 | x   |
| DH5 $\alpha$ (pUC119)*     | 45                                                | 4   | 3.5 | 10  | 21  | 5   | 0.5  | 7.5 | x   |
| EPI-300 (pCC1FOS)          | 45                                                | 4   | 3.5 | 10  | 21  | 5   | 0.5  | x   | 4   |
| EPI-300 (pCC1FOS)*         | 45                                                | 4   | 3.5 | 10  | 21  | 5   | 0.5  | x   | 4   |
| pAF1-5                     | 100                                               | -   | 10  | 21  | -   | -   | -    | 10  | x   |
| pAF1-5*                    | 100                                               | -   | 10  | 21  | -   | -   | -    | 10  | x   |
| pAQ2-2                     | 100                                               | 10  | -   | -   | -   | 10  | -    | -   | x   |
| pAQ2-2*                    | 100                                               | 10  | -   | -   | -   | 10  | -    | -   | x   |
| pAV2                       | 100                                               | -   | 8   | -   | 25  | -   | -    | x   | 20  |
| pAV2*                      | 100                                               | -   | 8   | -   | 25  | -   | -    | x   | 20  |
| pL-1                       | 80                                                | 15  | -   | 45  | -   | -   | -    | x   | -   |
| pL-1*                      | 80                                                | 15  | -   | 45  | -   | -   | -    | x   | -   |
| pAH4                       | -                                                 | 6   | -   | -   | -   | -   | 1    | x   | -   |
| pAH4*                      | -                                                 | 6   | -   | -   | -   | -   | 1    | x   | -   |
| pB-1-4                     | -                                                 | -   | -   | -   | -   | -   | -    | 10  | x   |
| pB-1-4*                    | -                                                 | -   | -   | -   | -   | -   | -    | 10  | x   |
| pBE3                       | -                                                 | -   | -   | 45  | -   | 10  | -    | x   | -   |
| pBE3*                      | -                                                 | -   | -   | 45  | -   | 10  | -    | x   | -   |
| pK2                        | 85                                                | -   | -   | 30  | -   | -   | -    | x   | -   |
| pK2*                       | 85                                                | -   | -   | 30  | -   | -   | -    | x   | -   |
| pBC1                       | -                                                 | -   | -   | -   | -   | 15  | -    | x   | -   |
| pBC1*                      | -                                                 | -   | -   | -   | -   | 20  | -    | x   | -   |
| pAW1                       | -                                                 | -   | -   | 25  | -   | -   | -    | x   | -   |
| pAW1*                      | -                                                 | -   | -   | 25  | -   | -   | -    | x   | -   |
| pAP3                       | -                                                 | -   | -   | 20  | -   | -   | -    | x   | -   |
| pAP3*                      | -                                                 | -   | -   | 20  | -   | -   | -    | x   | -   |

**Symbols and Abbreviations,** Str, Streptomycin; Gen, Gentamicin; Kan, Kanamycin; Neo, Neomycin Sulfate; Spc, Spectinomycin; Tet, Tetracycline; PolB, Polymexin B; Cp, Chloramphenicol; Amp, Ampicillin; \*, These subclones were treated with sub-lethal concentrations (0.1  $\mu\text{g/ml}$ ) of triclosan prior to check for cross resistance to other antibiotics; -, did not show any resistance; x, not checked for these antibiotics, as the cloning vector contained a gene for resistance to corresponding antibiotic.

**Supplementary Table S21.** List of open reading frames from a metagenomic clone, pAF1-5, and closely related proteins in GenBank.

| <b>ORF</b>     | <b>No. of amino acids</b> | <b>Closely related protein (organisms)</b>                                                | <b>% Identity</b> |
|----------------|---------------------------|-------------------------------------------------------------------------------------------|-------------------|
| 1              | 49                        | OsmC family protein [ <i>Pedobacter heparinus</i> DSM 2366]                               | 61                |
| 2 <sup>a</sup> | 301                       | Enoyl-(acyl carrier protein) reductase [ <i>Simkania negevensis</i> Z]                    | 73                |
| 3              | 134                       | NUDIX hydrolase [ <i>Holospira undulata</i> ]                                             | 55                |
| 4              | 264                       | Hypothetical protein LPO_1977 [ <i>Legionella pneumophila</i> subsp. <i>pneumophila</i> ] | 34                |
| 5              | 382                       | Hypothetical protein SNE_A10980 [ <i>Simkania negevensis</i> Z]                           | 31                |
| 6              | 124                       | Exopolysaccharide synthesis protein [ <i>Nostoc</i> sp. PCC 7120]                         | 36                |

<sup>a</sup> *orf2* encodes metagenomic triclosan tolerant YX7K type ENR.

**Supplementary Table S22.** List of open reading frames from a metagenomic clone, pAQ2-2, and closely related proteins in GenBank.

| <b>ORF</b>     | <b>No. of amino acids</b> | <b>Closely related protein (organisms)</b>                                 | <b>% Identity</b> |
|----------------|---------------------------|----------------------------------------------------------------------------|-------------------|
| 1 <sup>a</sup> | 325                       | Trans-2-enoyl-coA reductase [marine gamma <i>proteobacterium</i> HTCC2148] | 85                |
| 2 <sup>b</sup> | 279                       | Beta-lactamase [marine gamma <i>proteobacterium</i> HTCC2148]              | 69                |
| 3              | 597                       | Amino-acid metabolism [ <i>Mycobacterium</i> sp. 012931]                   | 30                |

<sup>a</sup> *orf1* encodes metagenomic mild triclosan tolerant FabV ENR homologue, with compromised ENR activity.

<sup>b</sup> *orf2* encodes metagenomics Beta-lactamase which conferred co resistance to other antibiotics.

**Supplementary Table S23.** List of open reading frames from a metagenomic clone, pAV2, and closely related proteins in GenBank.

| ORF             | No. of amino acids | Closely related proteins (organisms)                                                                                         | % Identity |
|-----------------|--------------------|------------------------------------------------------------------------------------------------------------------------------|------------|
| 1               | 53                 | Cyclopropane fatty acyl phospholipid synthase [ <i>Chlorobium luteolum</i> DSM 273                                           | 71         |
| 2               | 1021               | Uncharacterized iron-regulated protein [ <i>Desulfocapsa sulfexigens</i> DSM 10523                                           | 44         |
| 3               | 570                | Mg-protoporphyrin IX monomethyl ester oxidative cyclase [ <i>Desulfotalea psychrophila</i> LSv54]                            | 54         |
| 4               | 394                | Phosphoglycerate dehydrogenase-like oxidoreductase [ <i>Desulfocapsa sulfexigens</i> DSM 10523]                              | 70         |
| 5               | 317                | Iron-sulfur cluster-binding protein [ <i>Synechocystis</i> sp. PCC 6714]                                                     | 32         |
| 6 <sup>a</sup>  | 261                | Short-chain dehydrogenase/reductase SDR [ <i>Desulfobulbus propionicus</i> DSM 2032]                                         | 60         |
| 7 <sup>b</sup>  | 384                | RND transporter [ <i>Thiothrix nivea</i> ]                                                                                   | 60         |
| 8 <sup>c</sup>  | 187                | Antimicrobial peptide ABC transporter ATPase [ <i>Thioflaviccoccus mobilis</i> 8321]                                         | 63         |
| 9 <sup>d</sup>  | 402                | Antimicrobial peptide ABC transporter permease [ <i>Thioflaviccoccus mobilis</i> 8321]                                       | 62         |
| 10 <sup>e</sup> | 400                | ABC transporter permease [ <i>Psychromonas ingrahamii</i> 37]                                                                | 56         |
| 11 <sup>f</sup> | 149                | N-acetyltransferase GCN5 [ <i>Runella slithyformis</i> DSM 19594]                                                            | 59         |
| 12              | 936                | Histidine kinase, response regulator receiver domain, GAF domain-containing protein [ <i>Desulfotignum phosphitoxidans</i> ] | 62         |
| 13              | 330                | Hypothetical protein [ <i>Desulfocapsa sulfexigens</i> ]                                                                     | 33         |
| 14              | 220                | 5-AMP-activated protein kinase beta-1 subunit [ <i>Desulfobulbus propionicus</i> ]                                           | 52         |
| 15              | 186                | ECF subfamily RNA polymerase sigma-24 factor [ <i>Desulfobulbus propionicus</i> ]                                            | 51         |
| 16              | 143                | Osmotically inducible protein C [ <i>Paludibacter propionigenes</i> ]                                                        | 49         |
| 17              | 221                | Cytochrome C peroxidase [ <i>Desulfobacter postgatei</i> ]                                                                   | 54         |
| 18              | 813                | Ntr family sensory/regulatory protein [ <i>Desulfonatronum thiodismutans</i> ]                                               | 32         |
| 19              | 274                | ABC transporter substrate-binding protein                                                                                    | 37         |
| 20              | 170                | Hypothetical protein [ <i>Desulfobulbus</i> sp. Tol-SR]                                                                      | 84         |
| 21              | 234                | Hypothetical protein [ <i>Desulfobulbus</i> sp. Tol-SR]                                                                      | 71         |
| 22              | 169                | Hypothetical protein [ <i>Desulfobulbus</i> sp. Tol-SR]                                                                      | 76         |
| 23              | 159                | Cys-tRNA(Pro)/Cys-tRNA(Cys) deacylase ybaK [ <i>Glaciecola lipolytica</i> ]                                                  | 60         |

<sup>a</sup> *orf6* encodes metagenomic triclosan resistant FabL like ENR homologue.

<sup>b, c, d, e, f</sup> *orf7*, 8, 9, 10 and 11 encodes a cluster of efflux pumps and aminoglycoside deactivating enzyme, conferred co resistance to other antibiotics.

**Supplementary Table S24.** List of open reading frames from a metagenomic clone, PL, and closely related proteins in GenBank.

| ORF             | No. of amino acids | Closely related protein (organisms)                                                                 | % Identity |
|-----------------|--------------------|-----------------------------------------------------------------------------------------------------|------------|
| 1               | 182                | Membrane-associated zinc metalloprotease [ <i>Sulfuricurvum</i> sp. MLSB]                           | 76         |
| 2               | 184                | CDP-diacylglycerol--glycerol-3-phosphate 3-phosphatidyltransferase [ <i>Sulfuricurvum</i> sp. MLSB] | 86         |
| 3 <sup>a</sup>  | 255                | 7-alpha-hydroxysteroid dehydrogenase [uncultured <i>Sulfuricurvum</i> sp. RIFRC-1]                  | 96         |
| 4               | 78                 | Dihydrodipicolinate synthase [ <i>Sulfuricurvum</i> sp. MLSB]                                       | 85         |
| 5               | 215                | Dihydrodipicolinate synthase [ <i>Sulfuricurvum kujiense</i> ]                                      | 94         |
| 6               | 433                | Protease [ <i>Sulfuricurvum kujiense</i> DSM 16994]                                                 | 81         |
| 7               | 352                | Dihydroorotate dehydrogenase 2 [ <i>Sulfuricurvum</i> sp. MLSB]                                     | 87         |
| 8 <sup>b</sup>  | 568                | ABC transporter-like protein [ <i>Sulfuricurvum</i> sp. MLSB]                                       | 79         |
| 9               | 465                | CysteinyI-tRNA ligase [ <i>Candidatus Sulfuricurvum</i> sp. RIFRC-1]                                | 83         |
| 10 <sup>c</sup> | 467                | Multidrug transporter MurJ [ <i>Sulfuricurvum</i> sp. MLSB]                                         | 85         |
| 11              | 634                | Hypothetical protein [ <i>Sulfuricurvum kujiense</i> ]                                              | 61         |
| 12              | 187                | Holliday junction DNA helicase RuvA [ <i>Sulfuricurvum</i> sp. MLSB]                                | 82         |
| 13              | 345                | D-alanyl-alanine synthetase A [uncultured <i>Sulfuricurvum</i> sp. RIFRC-1]                         | 82         |
| 14              | 243                | 2-hydroxy-6-oxohepta-2,4-dienoate hydrolase [ <i>Sulfuricurvum</i> sp. MLSB]                        | 68         |
| 15              | 479                | Mur ligase middle domain-containing protein [uncultured <i>Sulfuricurvum</i> sp. RIFRC-1]           | 79         |
| 16              | 132                | HIT family hydrolase [uncultured <i>Sulfuricurvum</i> sp. RIFRC-1]                                  | 46         |
| 17              | 225                | Hypothetical protein [uncultured <i>Sulfuricurvum</i> sp. RIFRC-1]                                  | 75         |
| 18              | 472                | Hypothetical protein [uncultured <i>Sulfuricurvum</i> sp. RIFRC-1]                                  | 84         |
| 19              | 728                | ABC transporter ATP-binding and permease component [uncultured <i>Sulfuricurvum</i> sp. RIFRC-1]    | 78         |
| 20              | 445                | Secretion protein [uncultured <i>Sulfuricurvum</i> sp. RIFRC-1]                                     | 49         |
| 21              | 197                | Hypothetical protein [uncultured <i>Sulfuricurvum</i> sp. RIFRC-1]                                  | 31         |

<sup>a</sup> *orf3* encodes 7-alpha-hydroxysteroid dehydrogenase like ENR homologue.

<sup>b,c</sup> *orf8,10* encodes efflux pumps protein homologues, which might be associated with the observed resistance to other antibiotics.

**Supplementary Table S25.** List of open reading frames from a metagenomic clone, pB-1-4, and closely related proteins in GenBank.

| <b>ORF</b>     | <b>No. of amino acids</b> | <b>Closely related protein (organisms)</b>                                   | <b>% Identity</b> |
|----------------|---------------------------|------------------------------------------------------------------------------|-------------------|
| 1              | 95                        | 30S ribosomal protein S20 [ <i>Microbulbifer agarilyticus</i> ]              | 76                |
| 2 <sup>a</sup> | 395                       | Trans-2-enoyl-CoA reductase [ <i>Gilvimirinus chinensis</i> ]                | 78                |
| 3 <sup>b</sup> | 177                       | Alpha/beta fold family hydrolase [ <i>Calothrix</i> sp. PCC 7507]            | 29                |
| 4              | 916                       | Family 2 glycosyl transferase [ <i>Pseudomonas denitrificans</i> ATCC 13867] | 51                |

<sup>a</sup> *orf2* encodes metagenomic triclosan tolerant FabV ENR homologue.

<sup>b</sup> *orf3* encodes Alpha/beta fold family hydrolase homologue, which may be responsible for co-resistance to other antibiotics.

**Supplementary Table S26.** List of open reading frames from a metagenomic clone, pBF1, and closely related proteins in GenBank.

| ORF             | No. of amino acids | Closely related protein (organisms)                                                                 | % Identity |
|-----------------|--------------------|-----------------------------------------------------------------------------------------------------|------------|
| 1               | 185                | Membrane-associated zinc metalloprotease [ <i>Sulfuricurvum</i> sp. MLSB]                           | 75         |
| 2               | 185                | Cdp-diacylglycerol--glycerol-3-phosphate 3-Phosphatidyltransferase [ <i>Sulfuricurvum</i> sp. MLSB] | 79         |
| 3               | 94                 | Rele toxin [ <i>Sulfurospirillum</i> sp. SCADC]                                                     | 80         |
| 4               | 83                 | Antitoxin [ <i>Sulfurospirillum</i> sp. SCADC]                                                      | 83         |
| 5               | 41                 | Hypothetical protein [ <i>Sulfurospirillum</i> sp. SCADC]                                           | 27         |
| 6 <sup>a</sup>  | 258                | 7-alpha-hydroxysteroid dehydrogenase [ <i>Sulfurovum</i> sp. FS06-10]                               | 95         |
| 7               | 297                | Dihydrodipicolinate synthase [ <i>Candidatus Sulfuricurvum</i> sp. RIFRC-1]                         | 90         |
| 8               | 433                | Protease [ <i>Sulfuricurvum kujiense</i> DSM 16994]                                                 | 81         |
| 9               | 352                | Diguanylate cyclase [ <i>Sulfuricurvum kujiense</i> DSM 16994]                                      | 70         |
| 10              | 360                | Glycosyl transferase family protein [ <i>Sulfuricurvum</i> sp. MLSB]                                | 77         |
| 11 <sup>b</sup> | 571                | ABC transporter-like protein [ <i>Candidatus Sulfuricurvum</i> sp. RIFRC-1]                         | 82         |
| 12              | 465                | CysteinyI-trna ligase [uncultured <i>Sulfuricurvum</i> sp. RIFRC-1]                                 | 87         |
| 13 <sup>c</sup> | 467                | Multidrug transporter murj [uncultured <i>Sulfuricurvum</i> sp. RIFRC-1]                            | 61         |
| 14              | 631                | Hypothetical protein [uncultured <i>Sulfuricurvum</i> sp. RIFRC-1]                                  | 79         |
| 15              | 187                | Holliday junction dna helicase ruva [uncultured <i>Sulfuricurvum</i> sp. RIFRC-1]                   | 84         |
| 16              | 345                | D-alanyl-alanine synthetase A [uncultured <i>Sulfuricurvum</i> sp. RIFRC-1]                         | 83         |
| 17 <sup>d</sup> | 243                | Alpha/beta hydrolase fold protein [ <i>Sulfuricurvum kujiense</i> ]                                 | 66         |
| 18              | 479                | Mur ligase middle domain-containing protein [ <i>Sulfuricurvum kujiense</i> ]                       | 79         |
| 19              | 103                | Histidine triad (hit) protein [ <i>Sulfuricurvum kujiense</i> ]                                     | 79         |
| 20              | 217                | Hypothetical protein [ <i>Sulfuricurvum kujiense</i> ]                                              | 46         |
| 21              | 466                | Hypothetical protein [ <i>Sulfuricurvum kujiense</i> ]                                              | 70         |
| 22 <sup>e</sup> | 726                | ABC transporter atp-binding and permease component [ <i>Arcobacter butzleri</i> ]                   | 84         |
| 23              | 445                | Secretion protein ( <i>acra</i> ) [ <i>Arcobacter butzleri</i> ]                                    | 81         |
| 24              | 197                | Two-component response regulator [ <i>Campylobacter curvus</i> ]                                    | 56         |

<sup>a</sup> *orf6* encodes 7-alpha-hydroxysteroid dehydrogenase like ENR homologue.

<sup>b,c,d,e</sup> *orf1,13,17,22* encodes various efflux pumps protein homologues or hydrolases, which might be associated with the observed resistance to other antibiotics.



**Supplementary Table S27.** List of open reading frames from a metagenomic clone, pBC1, and closely related proteins in GenBank.

| ORF             | No. of amino acids | Closely related protein (organisms)                                                                   | % Identity |
|-----------------|--------------------|-------------------------------------------------------------------------------------------------------|------------|
| 1               | 478                | Hypothetical protein [ <i>Enterobacter cloacae</i> ]                                                  | 41         |
| 2               | 603                | Hypothetical protein [ <i>Sulfuricurvum kujiense</i> ]                                                | 75         |
| 3 <sup>a</sup>  | 569                | Hypothetical protein ( <i>acrB</i> ) [ <i>Sulfuricurvum</i> sp. MLSB]                                 | 88         |
| 4 <sup>b</sup>  | 529                | Hypothetical protein ( <i>acrB</i> ) [ <i>Sulfuricurvum</i> sp. MLSB]                                 | 94         |
| 5               | 261                | Hypothetical protein [uncultured <i>Sulfuricurvum</i> sp. RIFRC-1]                                    | 96         |
| 6 <sup>c</sup>  | 454                | RND transporter [ <i>Pseudomonas aeruginosa</i> ]                                                     | 15         |
| 7               | 188                | Hypothetical protein [ <i>Fictibacillus gelatini</i> ]                                                | 44         |
| 8               | 188                | 4-methyl-5-thiazole monophosphate biosynthesis protein [ <i>Sulfurimonas autotrophica</i> ]           | 69         |
| 9               | 248                | Hypothetical protein [ <i>Sulfuricurvum kujiense</i> ]                                                | 58         |
| 10              | 110                | Flagellar protein flag protein [ <i>Sulfuricurvum kujiense</i> ]                                      | 64         |
| 11              | 642                | Signal transduction histidine kinase [ <i>Sulfuricurvum kujiense</i> ]                                | 68         |
| 12              | 231                | Winged helix family two component transcriptional regulator [ <i>Desulfurispora thermophila</i> ]     | 25         |
| 13              | 84                 | Hypothetical protein [ <i>Sulfuricurvum kujiense</i> ]                                                | 75         |
| 14              | 148                | Hypothetical protein [ <i>Photobacterium ganghwense</i> ]                                             | 45         |
| 15              | 1184               | DNA-dirted DNA polymerase [ <i>Sulfuricurvum kujiense</i> DSM 16994]                                  | 94         |
| 16              | 360                | Hypothetical protein [ <i>Levilinea saccharolytica</i> ]                                              | 51         |
| 17              | 206                | Hypothetical protein [ <i>Syntrophomonas wolfei</i> ]                                                 | 12         |
| 18              | 87                 | Antitoxin YefM [ <i>Escherichia coli</i> ]                                                            | 20         |
| 19              | 284                | DNA-damage-inducible protein D family protein [ <i>Chlorobium phaeobacteroides</i> ]                  | 53         |
| 20              | 412                | Aminopeptidase [ <i>Pseudomonas oryzae</i> ]                                                          | 48         |
| 21              | 328                | Histidine kinase [ <i>Sulfuricurvum kujiense</i> DSM 16994]                                           | 89         |
| 22              | 736                | Diguanylate cyclase/phosphodiesterase [uncultured <i>Sulfuricurvum</i> sp. RIFRC-1]                   | 80         |
| 23              | 224                | Alanine racemase domain-containing protein [ <i>Methylococcus capsulatus</i> ]                        | 38         |
| 24              | 350                | Membrane-associated zinc metalloprotease [uncultured <i>Sulfuricurvum</i> sp. RIFRC-1]                | 92         |
| 25              | 202                | CDP-diacylglycerol--glycerol-3-phosphate 3-Phosphatidyltransferase [ <i>Sulfurimonas gotlandica</i> ] | 74         |
| 26 <sup>d</sup> | 258                | 7-alpha-hydroxysteroid dehydrogenase [ <i>Clostridium sordellii</i> ]                                 | 35         |
| 27              | 297                | Dihydrodipicolinate synthase [ <i>Nitrospina gracilis</i> ]                                           | 47         |
| 28              | 433                | Protease [ <i>Sulfuricurvum kujiense</i> DSM 16994]                                                   | 90         |
| 29              | 352                | Dihydroorotate dehydrogenase 2 [uncultured <i>Sulfuricurvum</i> sp. RIFRC-1]                          | 99         |
| 30 <sup>e</sup> | 549                | ABC transporter-like protein [ <i>Sulfuricurvum</i> sp. MLSB]                                         | 83         |
| 31              | 422                | CysteinyI-tRNA synthetase [ <i>Escherichia coli</i> ]                                                 | 40         |

<sup>a,b,c,e</sup> *orf*3,4,6,30 encodes various efflux pumps protein homologues, which might be associated with the observed resistance to other antibiotics. <sup>d</sup> *orf*26 encodes 7-alpha-hydroxysteroid dehydrogenase like ENR homologue.

**Supplementary Table S28.** The co-localized antibiotic resistance genes in metagenomic triclosan resistant clones.

| No. | Subclone | Known Ab <sup>R</sup> genes | Efflux pumps                                               | ENRs                                    |
|-----|----------|-----------------------------|------------------------------------------------------------|-----------------------------------------|
| 1   | pAF1-5   | -                           | -                                                          | -                                       |
| 2   | pAQ2-2   | Beta-lactamase              | -                                                          | FabV                                    |
| 3   | pAV2     | N-acetyltransferase         | 1. ABC transporter<br>2. RND Protein                       | FabL                                    |
| 4   | pL1      | -                           | 1. ABC transporter<br>2. MurJ                              | 7- $\alpha$ -HSDH                       |
| 5   | pAH4     | -                           | ABC transporter                                            | Hypothetical protein like ENR candidate |
| 6   | pB-1-4   | -                           | -                                                          | -                                       |
| 7   | pBE3     | -                           | 1. OM Efflux<br>2. MFS <sup>T</sup><br>3. MFS <sup>T</sup> | -                                       |
| 8   | pBF1-4   | -                           | 1. MurJ<br>2. ABC transporters<br>3. <i>acrA</i>           | 7- $\alpha$ -HSDH                       |
| 9   | pBC1     | -                           | 1. <i>acrB</i><br>2. <i>acrB</i><br>3. ABC transporter     | 7- $\alpha$ -HSDH                       |
| 10  | pAW1     | -                           | -                                                          | -                                       |
| 11  | pAP3     | -                           | MFS <sup>T</sup>                                           | -                                       |

**Symbols and Abberviations:** -; absent, Ab<sup>R</sup>; Antibiotic resistant, MFS<sup>T</sup>; MFS transporter, OM; Outer membrane, RND; Resistance nodulation division, *acrB*; Acriflavin resistance protein B, *acrA*; Acriflavin resistance protein A, 7- $\alpha$ -HSDH; 7- $\alpha$ -hydroxysteroid dehydrogenase.

**Supplementary Table S29.** Presence of mobile elements signatures in metagenomic triclosan resistant clones.

| <b>No.</b> | <b>Clone</b> | <b>Mobile/transposable element</b> |
|------------|--------------|------------------------------------|
| 1          | pBE3         | Present                            |
| 2          | pAY4-1       | Present                            |
| 3          | pAY4-2       | Present                            |
| 4          | pAX1         | Present                            |
| 5          | pAP3         | Present                            |
| 6          | pY-3         | Present                            |
| 7          | pAU2-3       | Present                            |

**Supplementary Table S30.** Metagenomic clones/subclones with Genbank accession numbers.

| <b>No.</b> | <b>Clone Name</b> | <b>GenBank<br/>accession<br/>numbers</b> |
|------------|-------------------|------------------------------------------|
| 1          | pAB1-2            | KT860427                                 |
| 2          | pAF1-5            | KT860426                                 |
| 3          | pBB2-1            | KT860425                                 |
| 4          | pAQ2-2            | KT860430                                 |
| 5          | pAT4-2            | KT860431                                 |
| 6          | pJ-1-4            | KT860432                                 |
| 7          | pQ-2-2            | KT860433                                 |
| 8          | pQ2N              | KT860434                                 |
| 9          | pY-3              | KT860435                                 |
| 10         | pR-2-2            | KT860436                                 |
| 11         | pAY2-1            | KT860437                                 |
| 12         | pX-1              | KT860438                                 |
| 13         | pW-1              | KT860439                                 |
| 14         | pB-1-4            | KT860440                                 |
| 15         | pD-1-6            | KT860441                                 |
| 16         | pAU2-3            | KT868816                                 |
| 17         | pAH4              | KT884454                                 |
| 18         | pAV2              | KT884455                                 |
| 19         | pA-2              | KT860428                                 |
| 20         | pAL1-4            | KT860429                                 |
| 21         | pAXI              | KT982357                                 |
| 22         | pAG2              | KT982358                                 |
| 23         | pAP3              | KT982359                                 |
| 24         | pAW1              | KT982360                                 |
| 25         | pAY4-1            | KT982361                                 |
| 26         | pAZ2              | KT982362                                 |
| 27         | pAM1              | KT982363                                 |
| 28         | pAY4-2            | KT982364                                 |
| 29         | pBC1              | KT982365                                 |
| 30         | pBE3              | KT982366                                 |
| 31         | pBF1              | KT982367                                 |
| 32         | pL                | KT982368                                 |

**Supplementary Table S31.** Strains and plasmids used in this work.

| Strain or plasmid/<br>others | Relevant characteristics <sup>a</sup>                                                                                                                                                                             | Source or reference             |
|------------------------------|-------------------------------------------------------------------------------------------------------------------------------------------------------------------------------------------------------------------|---------------------------------|
| <i>E. coli</i>               |                                                                                                                                                                                                                   |                                 |
| DH5α                         | F-, Δ( <i>argF-lac</i> )169, φ80d <i>lacZ</i> 58(M15), Δ <i>phoA8</i> , <i>glnX44</i> (AS), λ-, <i>deoR481</i> , <i>rfbC1?</i> , <i>gyrA96</i> (NalR), <i>recA1</i> , <i>endA1</i> , <i>thiE1</i> , <i>hsdR17</i> | [Sambrook <i>et al.</i> , 1989] |
| EPI-300                      | F-, <i>mcrA</i> Δ( <i>mrr-hsd RMS-mcrBC</i> ) Φ80d <i>lacZ</i> ΔM15 Δ <i>lacX74 recA1 endA1 araD139</i> Δ( <i>ara, leu</i> )7697 <i>galU galK</i> λ- <i>rpsL</i> ( <i>StrR</i> ) <i>nupG trfA tonA</i>            | [Epicentre]                     |
| JP1111                       | <i>galE45</i> (GalS), λ-, <i>fabI392</i> (ts), <i>relA1</i> , <i>spoT1</i> , <i>thiE1</i>                                                                                                                         | [Egan AF & Russell RRB, 1973]   |
| CL37                         | <i>fabG</i> (Ts) <i>fabF</i> ::Kan <i>zce-727</i> ::Tn10 of MG1655                                                                                                                                                | [Lai CY & Cronan JE, 2004]      |
| Plasmids                     |                                                                                                                                                                                                                   |                                 |
| pCC1FOS                      | Cp <sup>f</sup> , copy control fosmid vector                                                                                                                                                                      | [Epicentre]                     |
| pUC119                       | Ap <sup>r</sup> , cloning vector                                                                                                                                                                                  | [Yanisch-Perron, 1985]          |
| pGEM®-T Easy                 | Ap <sup>r</sup> , cloning vector                                                                                                                                                                                  | [Promega]                       |
| pC <i>jej7α</i>              | 7-α-HSDH gene of <i>Campylobacter jejuni</i> NCTC11168 in pGEM®-T Easy                                                                                                                                            | [This study]                    |
| pH <i>py7α</i>               | 7-α-HSDH gene of <i>Helicobacter pylori</i> HPKTCC B0100 in pGEM®-T Easy                                                                                                                                          | [This study]                    |
| Transposon                   |                                                                                                                                                                                                                   |                                 |
| EZ-Tn5™ <KAN-2> transposon   | Kan <sup>r</sup> , Random mutagenesis of plasmid DNA                                                                                                                                                              | [Epicentre]                     |

<sup>a</sup> Ap<sup>r</sup>, ampicillin resistance; Cp<sup>f</sup>, chloramphenicol resistance; Tc<sup>r</sup>, tetracycline resistance; Kan<sup>r</sup>, Kanamycin resistance.

## References

- Egan, A.F. and Russell, R.R.B. (1973) Conditional mutations affecting the cell envelope of *Escherichia coli* K-12. *Genet Res* **21**: 139–152.
- Lai, C.Y. and Cronan, J.E. (2004) Isolation and characterization of  $\beta$ -ketoacyl-acyl carrier protein reductase (*fabG*) mutants of *Escherichia coli* and *Salmonella enterica* serovar Typhimurium. *J Bacteriol* **186**: 1869–1878.
- Sambrook, J., Fritsch, E. and Maniatis, T. (1989) *Molecular Cloning: a Laboratory Manual*. Cold Spring Harbor Laboratory Press: New York.
- Yanisch-Perron, C., Vieira, J. and Messing, J. (1985) Improved M13 phage cloning vectors and host strains: nucleotide sequences of the M13mpl8 and pUC19 vectors. *Gene* **33**: 103–119.
